# Supplementary material for: Fungal-Bacterial Combinations in Plant Health under Stress: Physiological and Biochemical Characteristics of the Filamentous Fungus Serendipita indica and the Actinobacterium Zhihengliuella sp. ISTPL4 under In Vitro Arsenic Stress
Source: MDPI journal article supplement (doi:10.3390/microorganisms12020405), 2024-02-17
Supplement: s1 [file s1]

## Supplementary Material

A total of 67 metabolites were produced by a combination of *S. indica* and *Z. sp.* ISTP4 under normal conditions and 37 metabolites were produced in As stress (out of which 16 metabolites were common)

1. Compound name: 2,4-Di-tert-butyl-phenol) phosphate

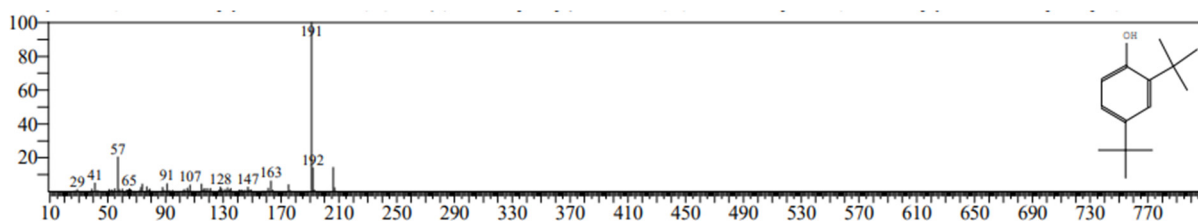

2. Compound name: Cyclo(L-prolyl-L-valine)

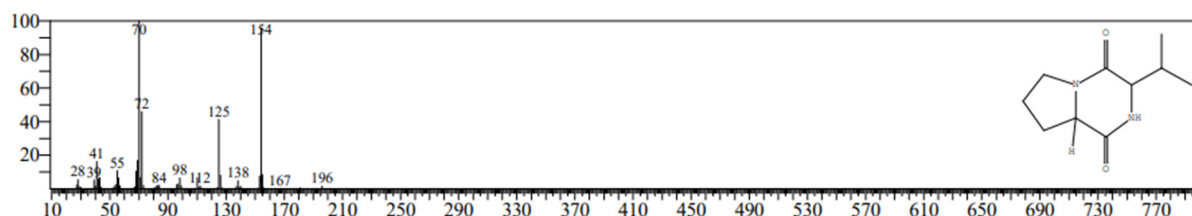

3. Compound name: 1,2-Benzenedicarboxylic acid, bis (2-methyl propyl) ester

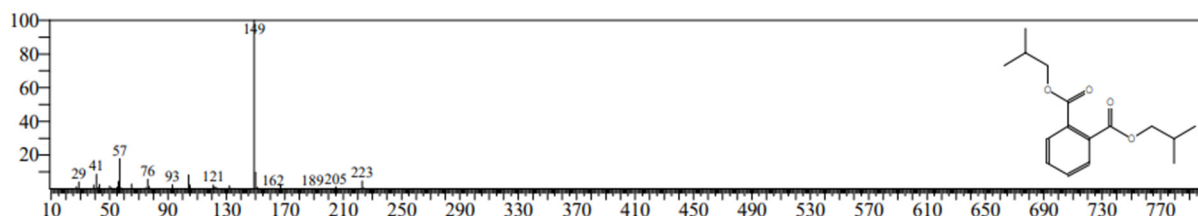

4. Compound name: Hexadecenoic acid, methyl ester

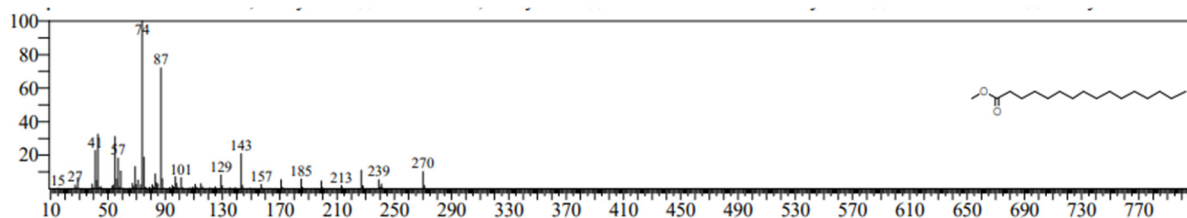

5. Compound name: Pyrrole[1,2-a] pyrazine-1,4-dione, hexahyd dro-3-(2-methyl propyl)

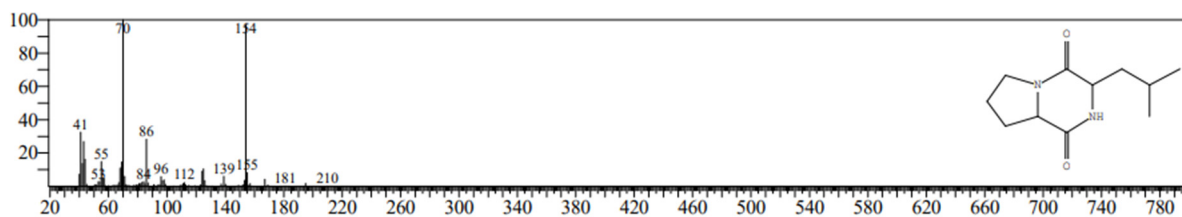

6. Compound name: Methyl stearate

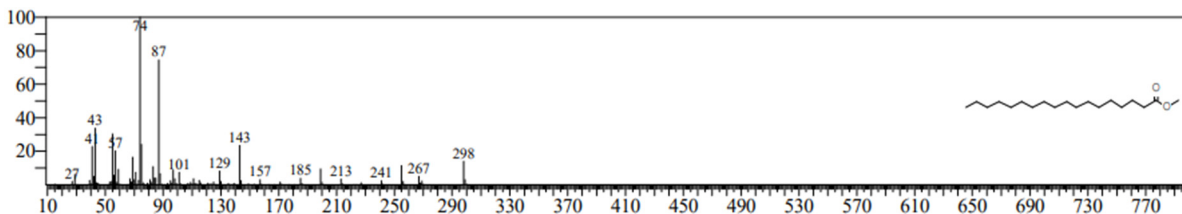

7. Compound name: 2-Ethylbutyric acid, eicosyl ester

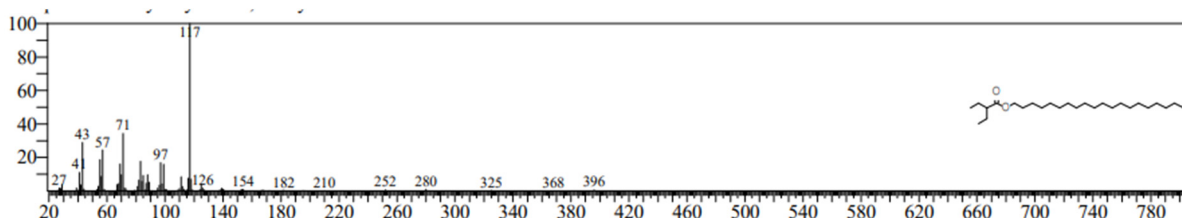

8. Compound name: 2-(4-Hydroxy-4-methyl-tetrahydro-pyran-3-ylamino)-3-(1H-indol-2-yl)-propionic acid

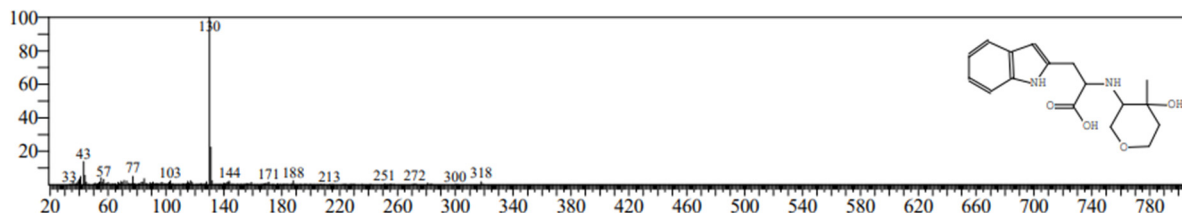

9. Compound name: Lycopene

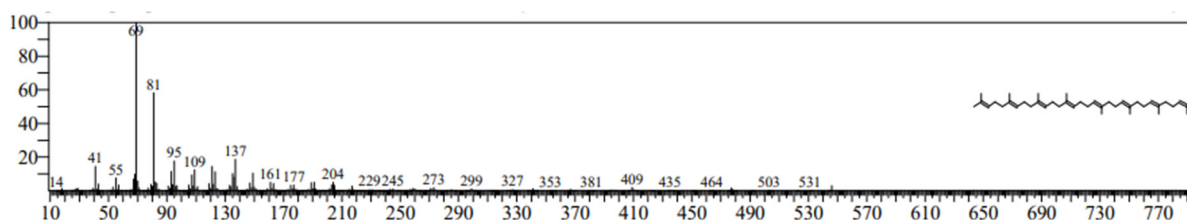

10. Compound name: Hexadecanoic acid, 2-hydroxy-1- (hydro oxymethyl) ethyl ester

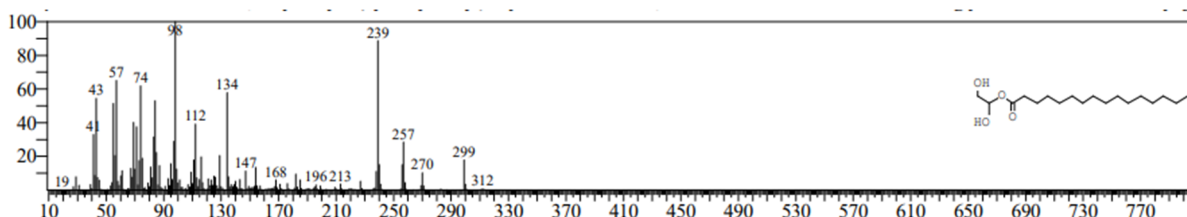

11. Compound name: Octocrylene 2-Propenoic acid

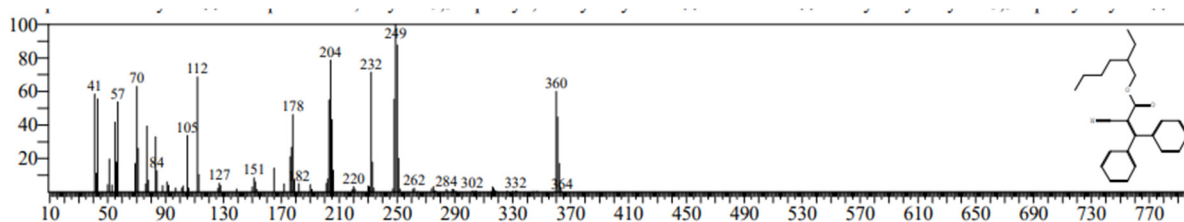

12. Compound name: Octadecanoic acid, 2,3-dihydroxypropyl ester

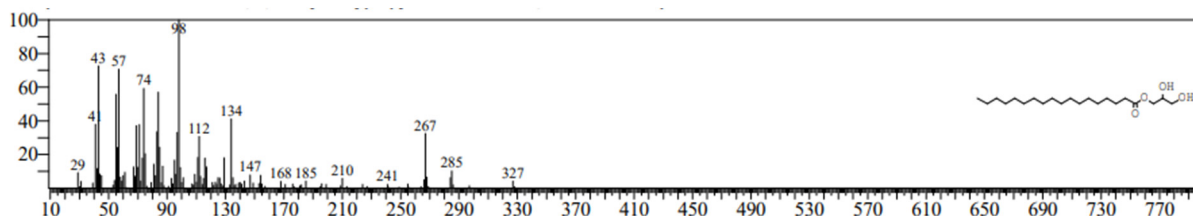

13. Compound name: Squalene e 2,6,10,14,18,22-Tetracosahexaene

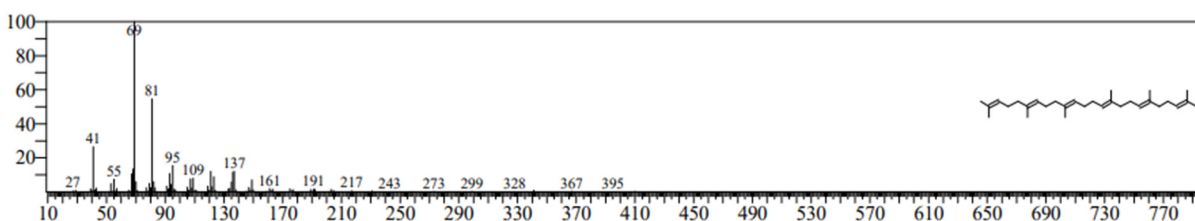

14. Compound name: Phenol, 2,4-bis (1,1-dimethyl ethyl)-, phosphite

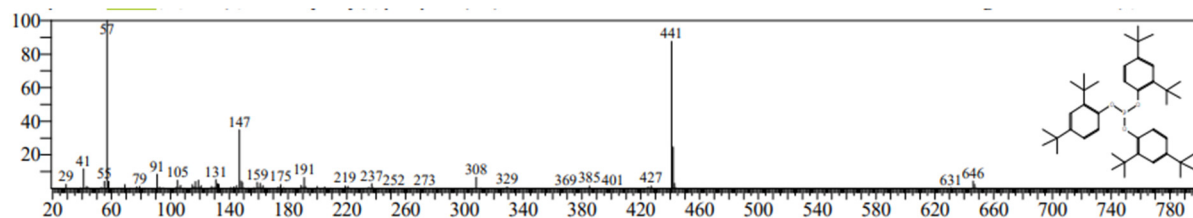

15. Compound name: Tris (2,4-di-tert-butyl phenyl) phosphate

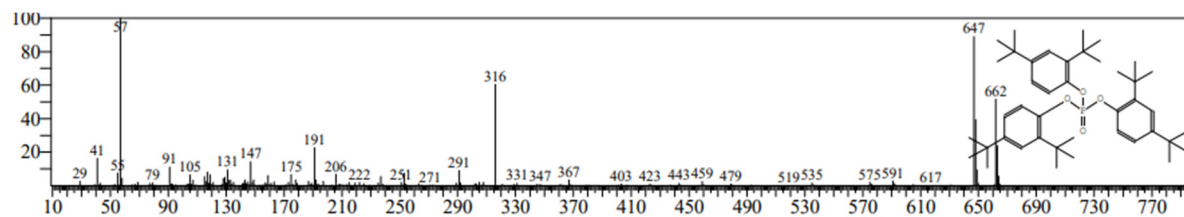

16. Compound name: Octahydro-2H-pyrido(1,2-a)pyrimidin-2-one

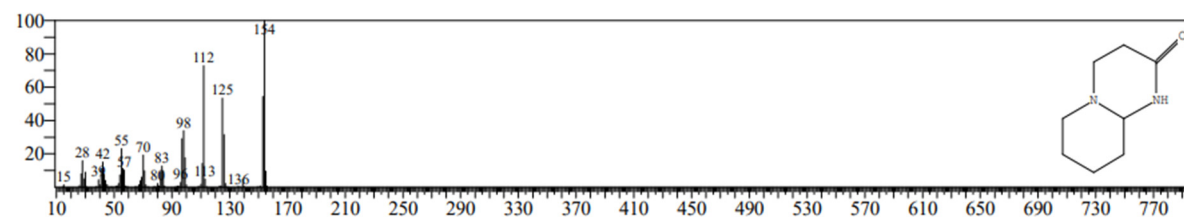

17. Compound name: Olean-18-ene

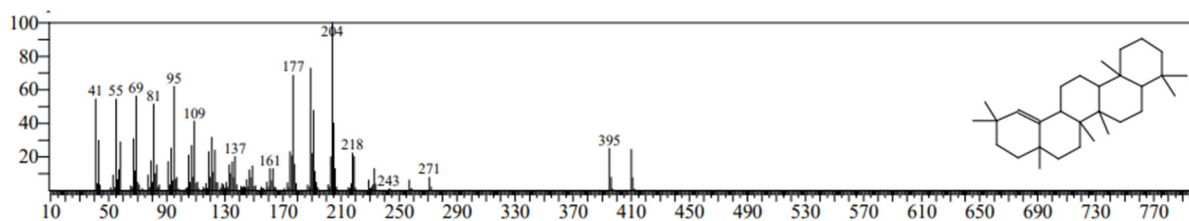

18. Compound name: l-Leucine

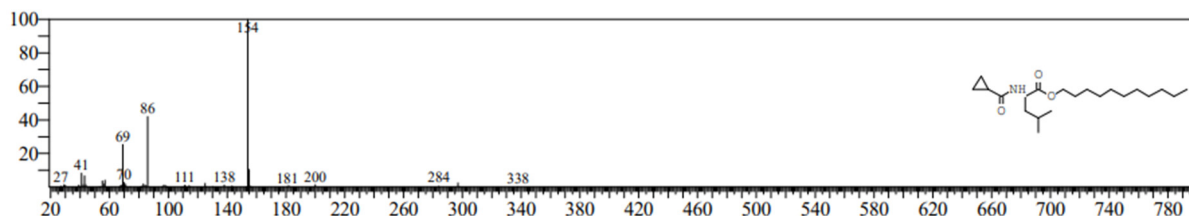

19. Compound name: L-Proline

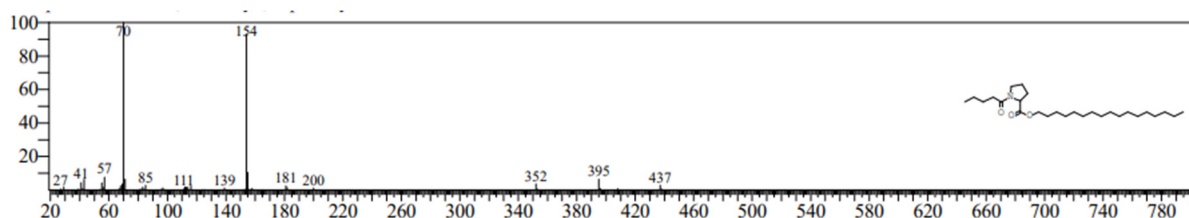

20. Compound name: Ergotaman-3',6',18-trione

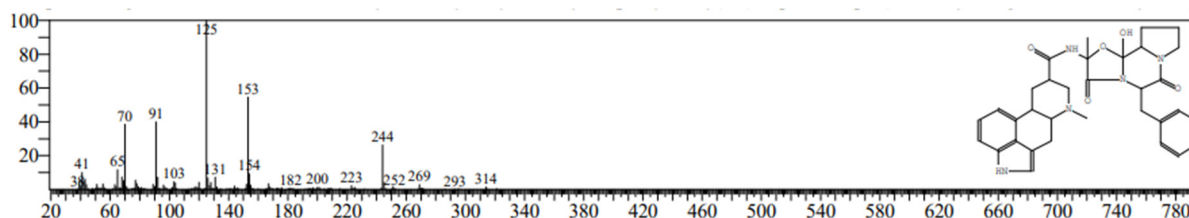

21. Compound name: Bis(2-ethylhexyl) phthalate

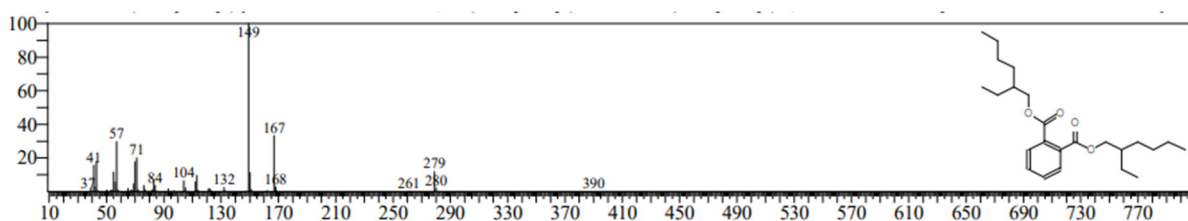

22. Compound name: 7,9-Di-tert-butyl-1-oxaspiro (4,5) deca-a-6,9-diene-2,8-dione

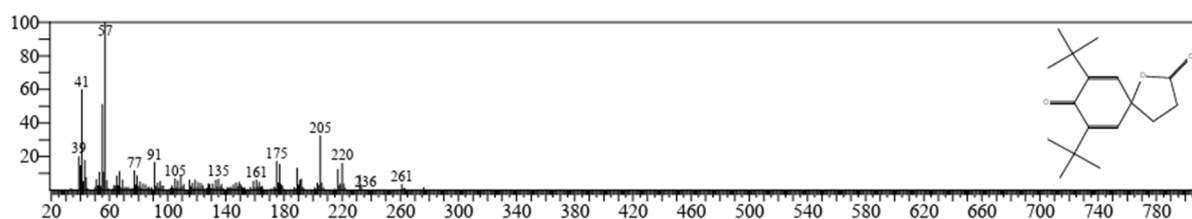



23. Compound name: 1,2-Benzenedicarboxylic acid, butyl octyl ester

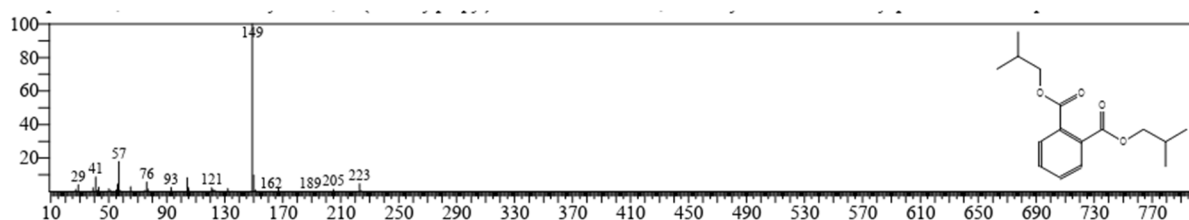

**Mass fragmentation pattern and structural elucidations of unique metabolites secreted by *Serendipita indica* under normal growth conditions**

1. Compound name: Dodecane,4,6-dimethyl

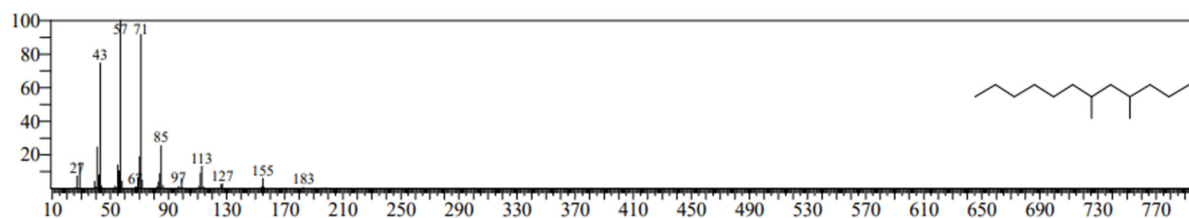

2. Compound name: Tetradecane

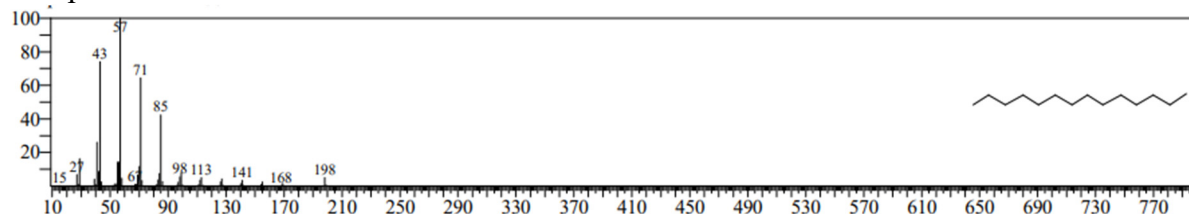

3. Compound name: Eicosane

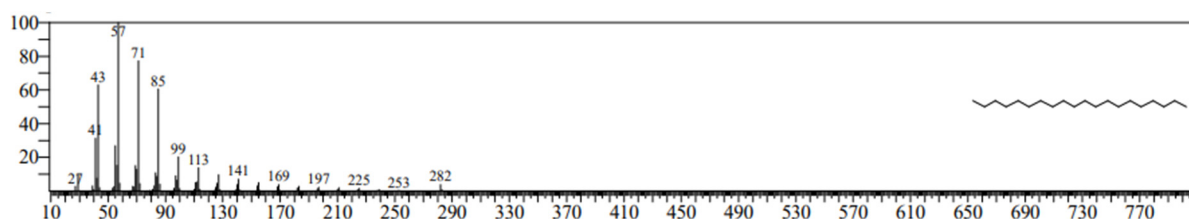

4. Compound name: 1-Hexadecanol

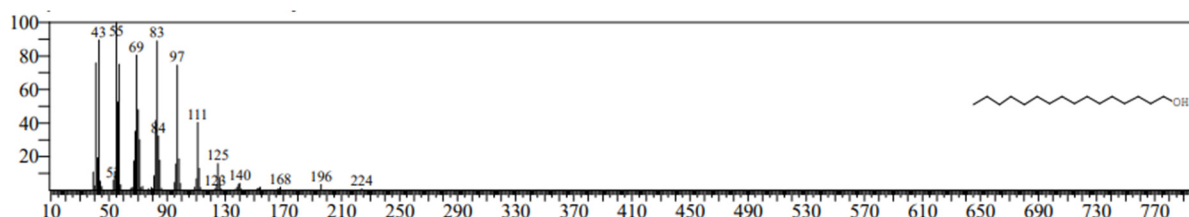

5. Compound name: Nonadecane

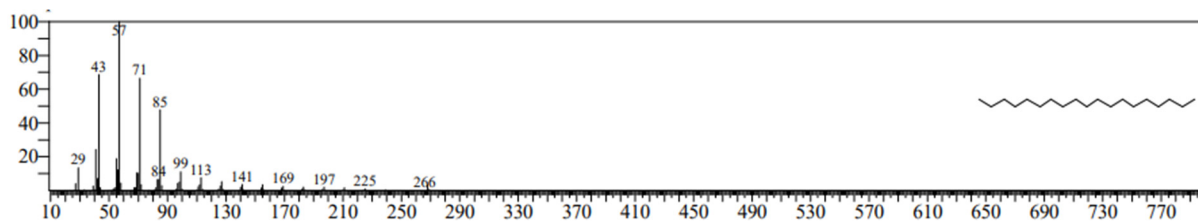

6. Compound name: Heneicosane

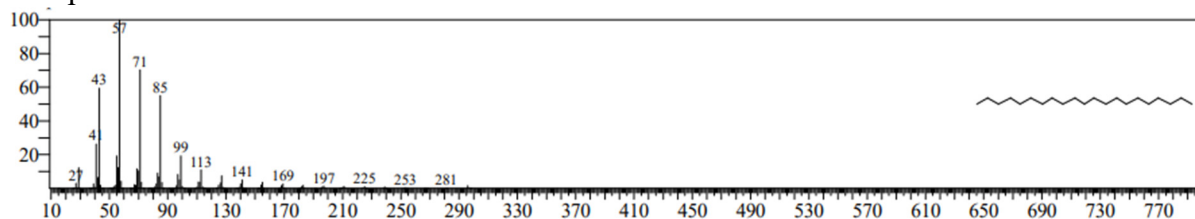

7. Compound name: 2-Propenoic acid, pentadecyl ester

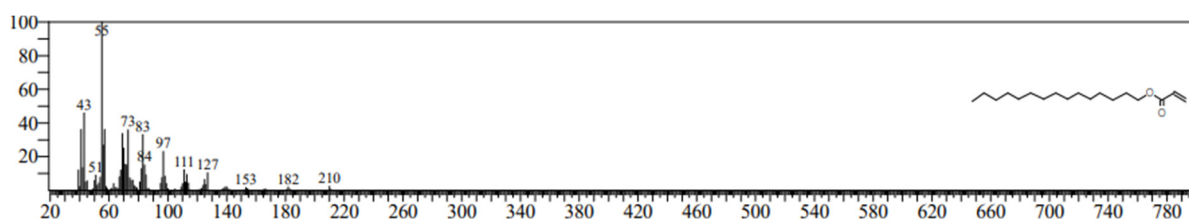

8. Compound name: Octadecane

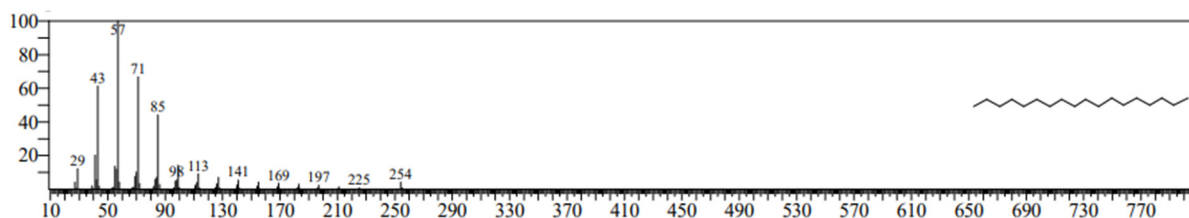

9. Compound name: Isopropyl myristate

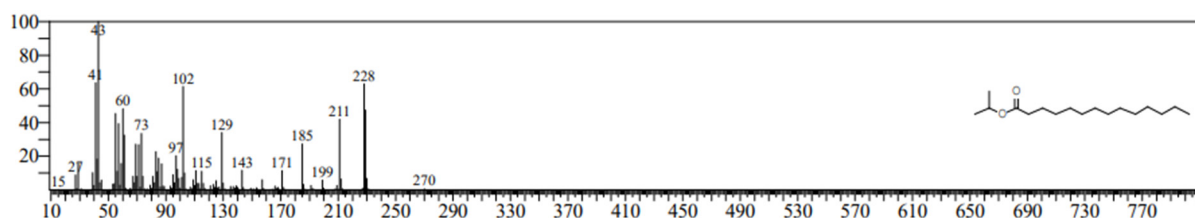

10. Compound name: Trifluoro acetoxy hexadecane

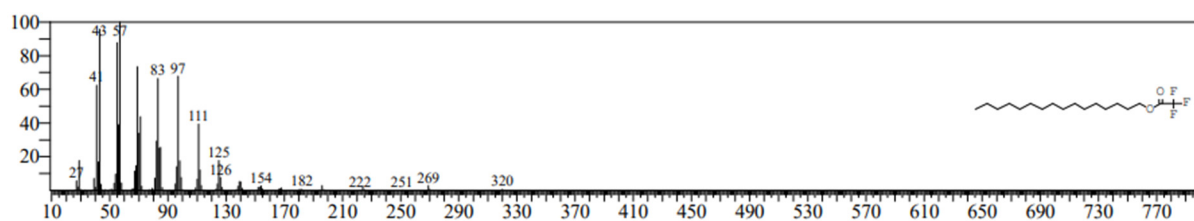

11. Compound name: Tetracosane

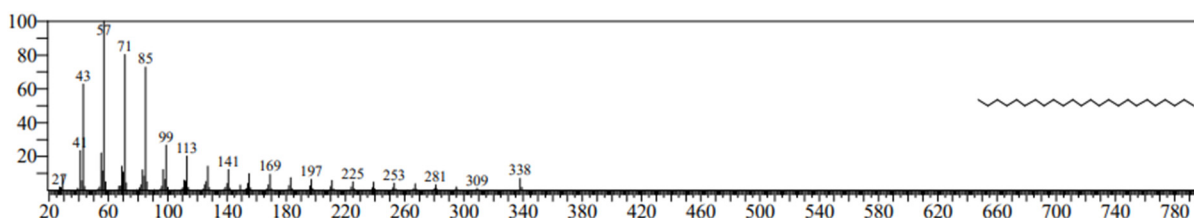

12. Compound name: Hexacosyl nonyl ether

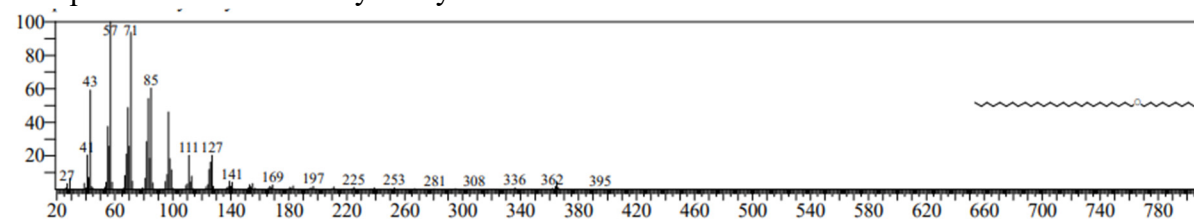

13. Compound name: Dibutyl phthalate

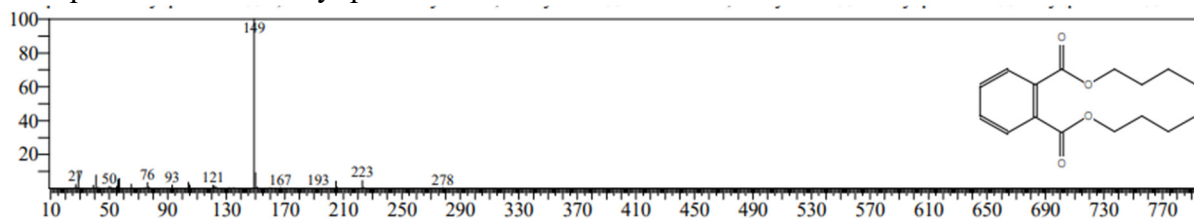

14. Compound name: 1-(+)-Ascorbic acid 2,6-dihexadecanoate

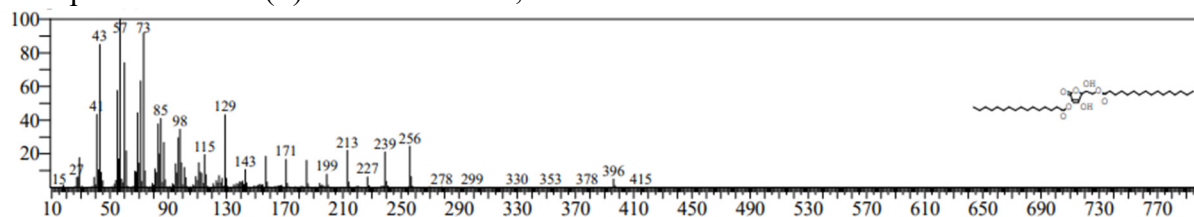

15. Compound name: Phthalic acid, 5-methylhex-yl butyl ester

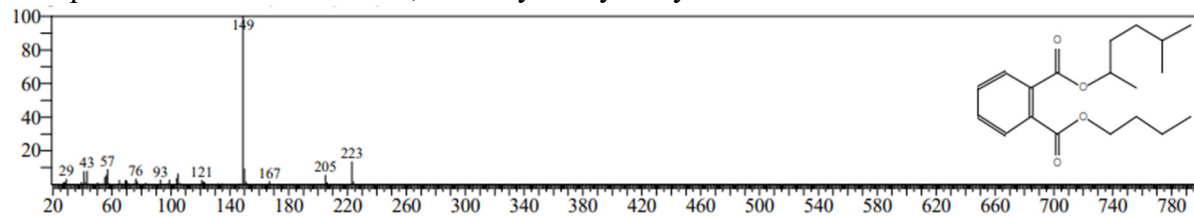

16. Compound name: Docosanoic acid, ethyl ester

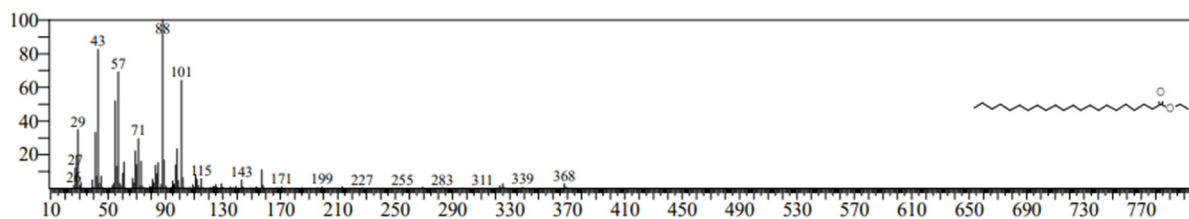

17. Compound name: Isopropyl palmitate

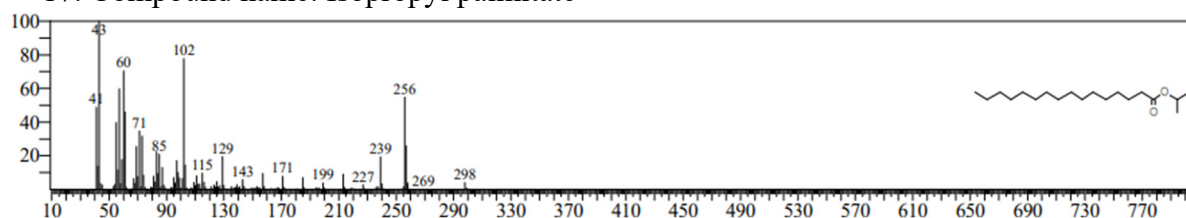

18 Compound name: n-Tetracosanol-1

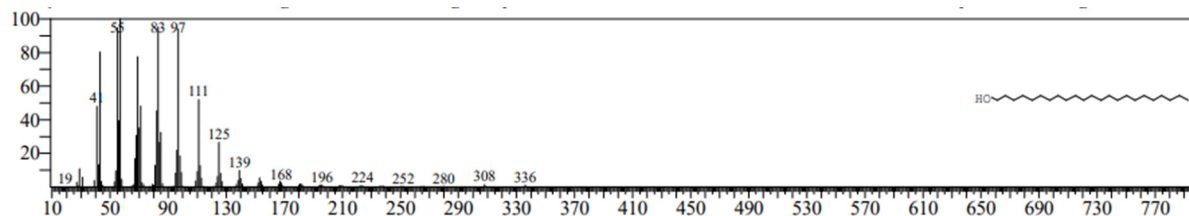

19. Compound name: 2-Methyltetracosane

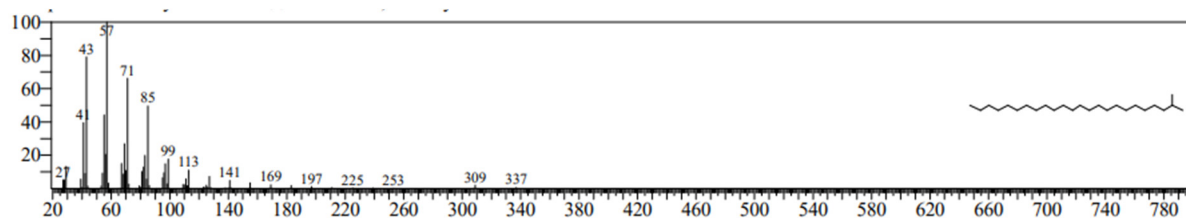

20 Compound name: Nonadecane nitrile

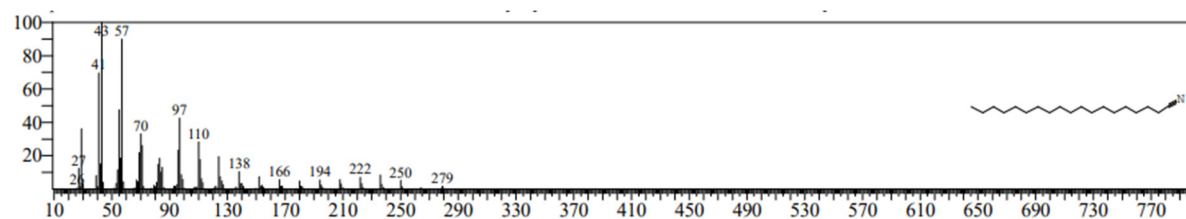

21 Compound name: Dodecane, 1,1-dimethoxy- Lauraldehyde

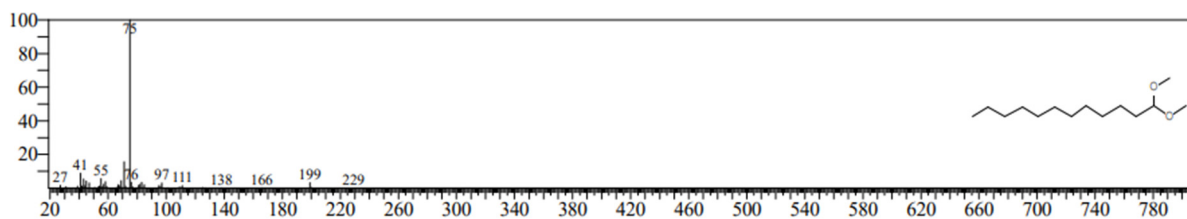

22. Compound name: Octadecanoic acid, 3-oxo-, ethyl ester

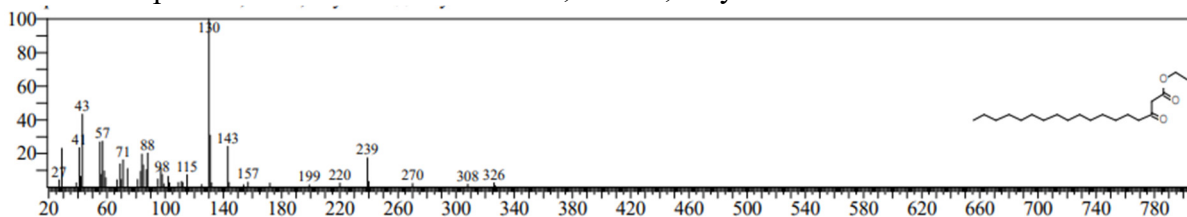

23. Compound name: 1,3-Benzenedicarboxylic acid, bis(2-ethylhexyl) ester

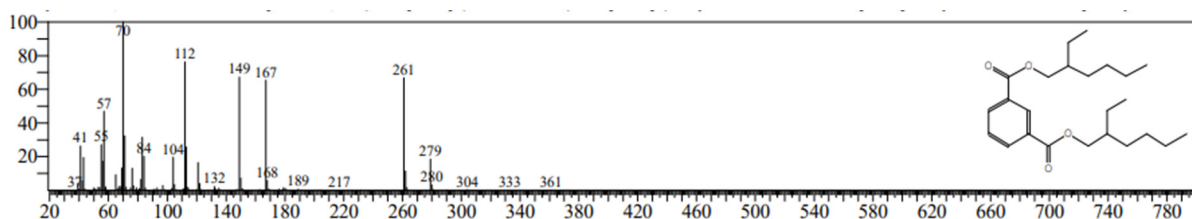

24. Compound name: 2-Methylhexacosane

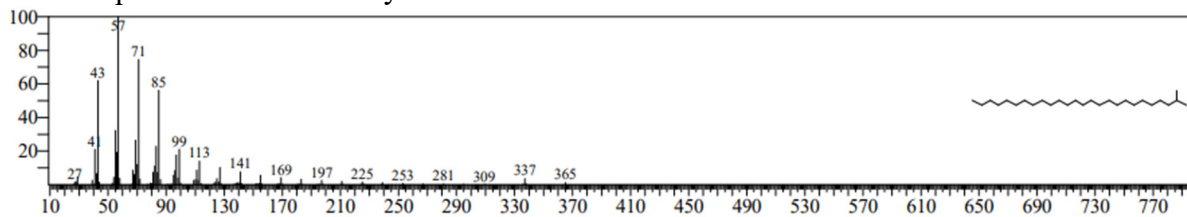

25. Compound name: 2-Isopropyl-5-methyl-1-heptanol

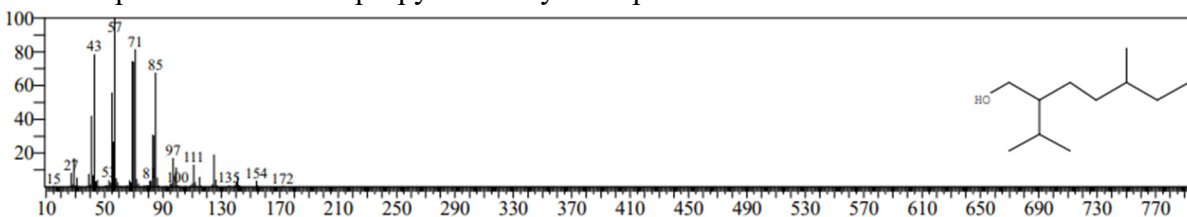

26. Compound name: Dodecane, 2,6,11-trimethyl

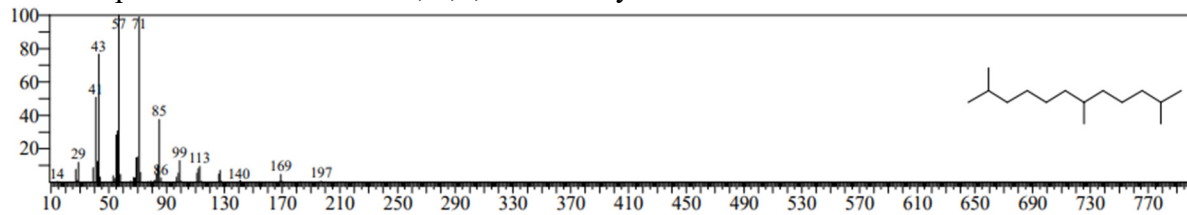

27. Compound name: 2,6,10-Trimethyltridecane

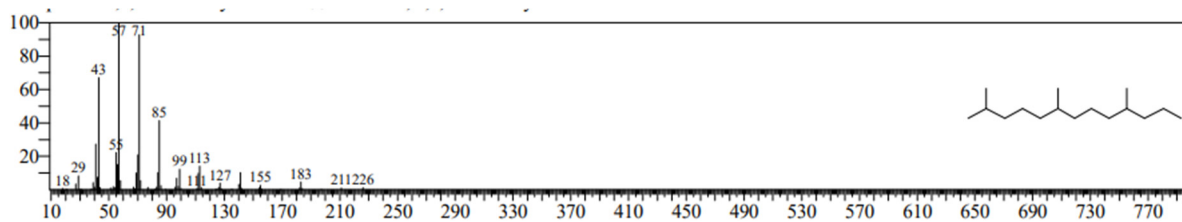

28. Compound name: Behenic alcohol

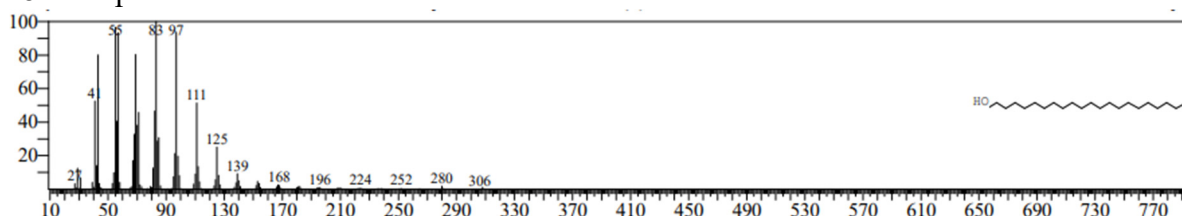

29. Compound name: N-2-ethylhexyl acetone imine

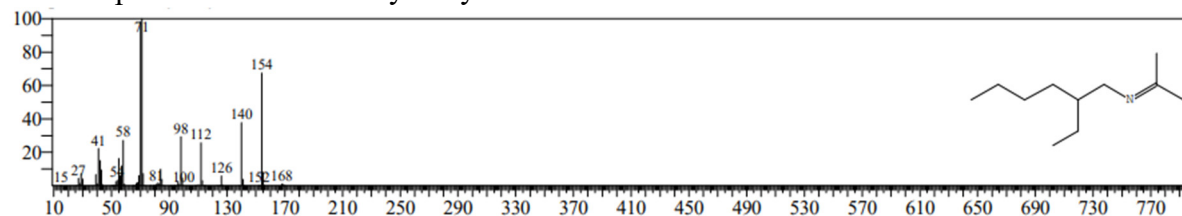

30. Compound name: N(1)-(3-Methyl-1,2,4-oxadiazol-5-yl)-1-pyrrolidinecarboxamide

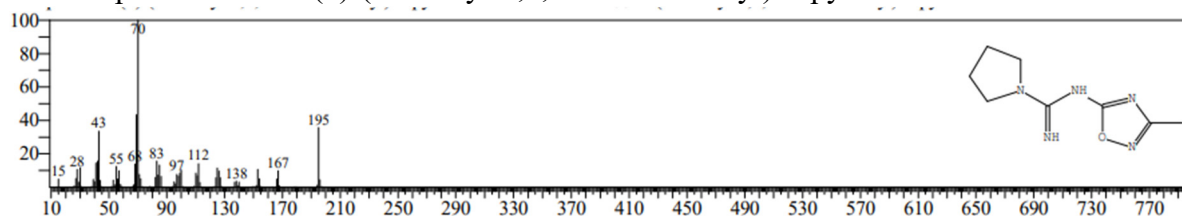

31. Compound name: 1-(+)-Ascorbic acid 2,6-dihexadecanoate

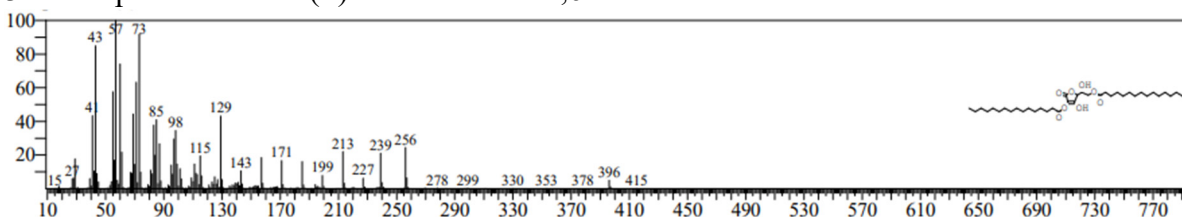

32. Compound name: Heptadecyl trifluoroacetate

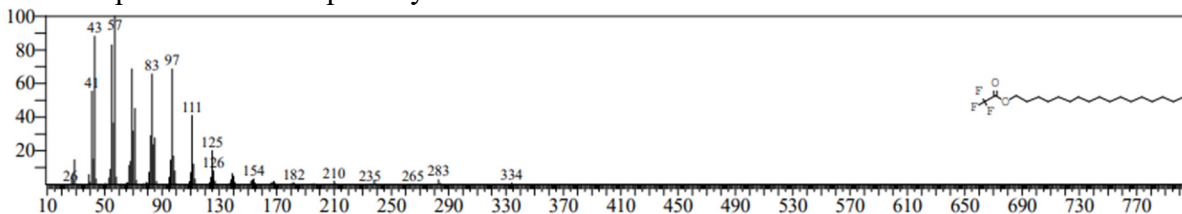

33. Compound name: 5,5-Diethylpentadecane



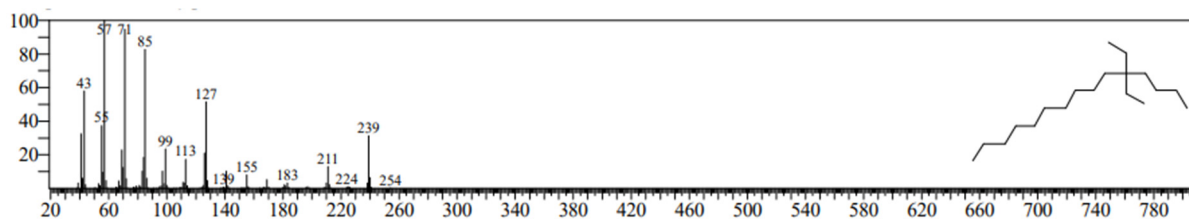

34. Compound name: Heptacos-1-ene

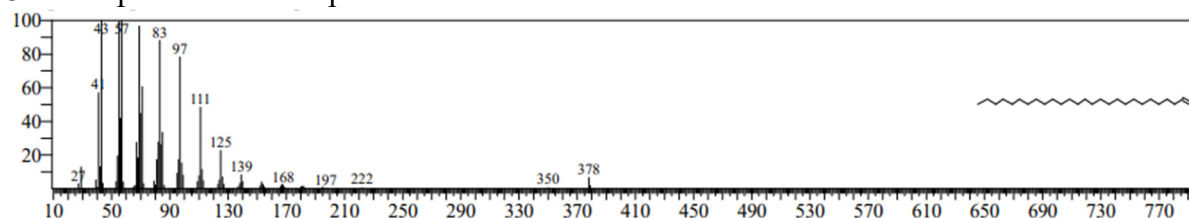

35. Compound name: 12,12-Dimethoxydodecanoic acid, methyl ester

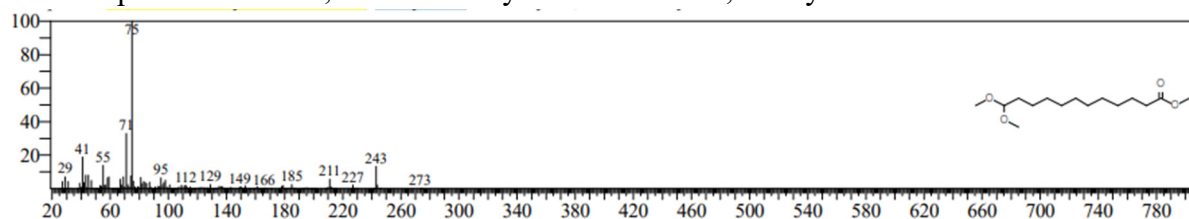

36. Compound name: Glycine

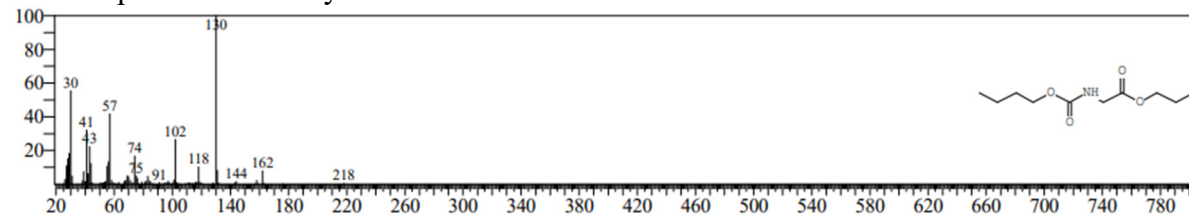

37. Compound name: Formamide, N-(4-[2-(1,1-dimethylethyl)-5-oxo-1,3-dioxolan-4-yl]butyl)

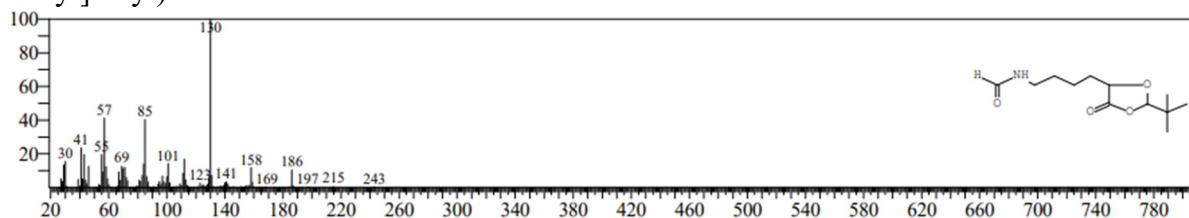

38. Compound name: Quinoline-4-carboxamide 2-phenyl-N-n-octyl

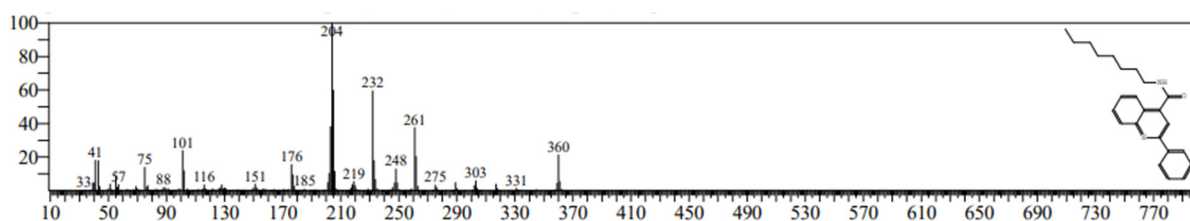

39. Compound name: Methanone, (3,5-dimethyl-1-piperidyl)(2-phenyl-4-quinolinyl)-

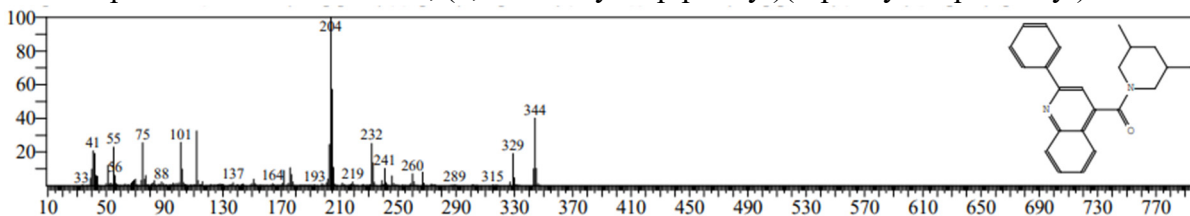

40. Compound name: Silane

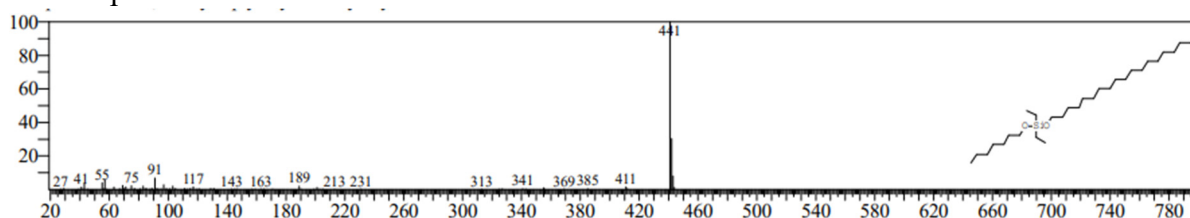

41. Compound name: Propionitrile 3-(3,5-di-tert-butyl-4-hydroxyphenyl)thio-

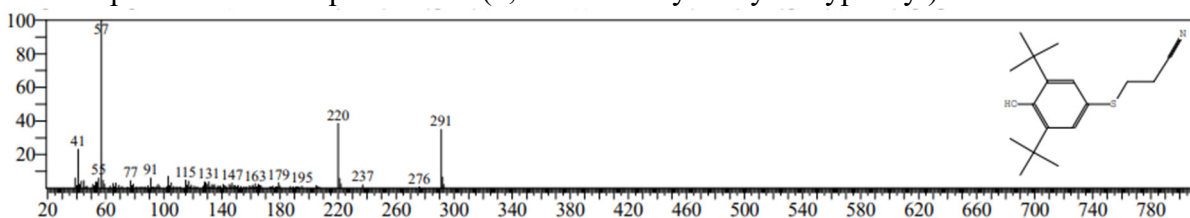

## Mass fragmentation pattern and structural elucidations of unique metabolites secreted by *Serendipita indica* in presence of arsenic stress

1. Compound name: Tridecanoic acid, 12-methyl-, methyl ester

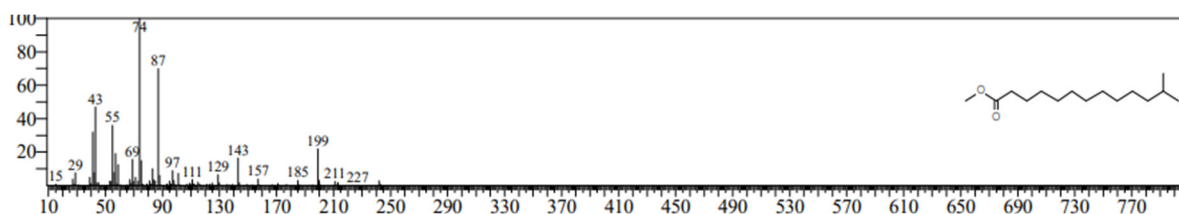

2. Compound name: n-Hexadecanoic acid

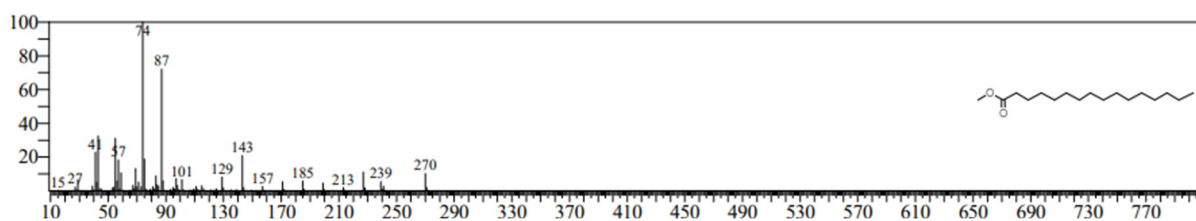

3. Compound name: 9-Octadecenoic acid, methyl ester, (E)- Elaidic acid

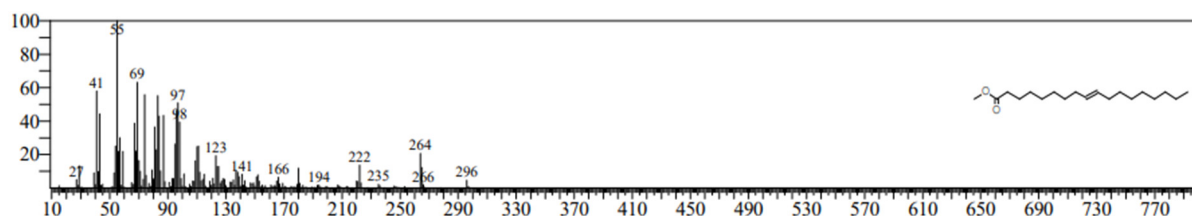

4. Compound name: Tetratriacontyl heptafluorobutyrate

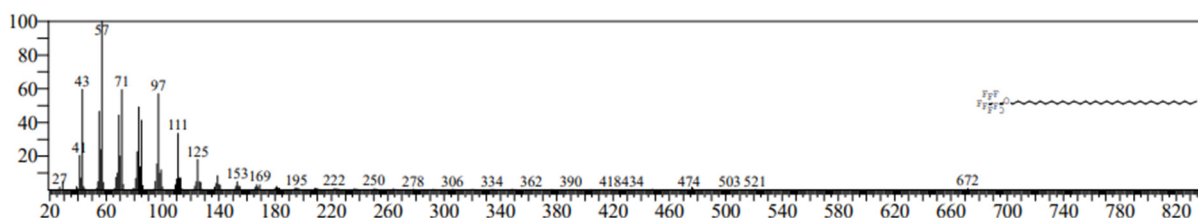

5. Compound name: Myristic acid, glycidyl ester Tetradecanoic acid

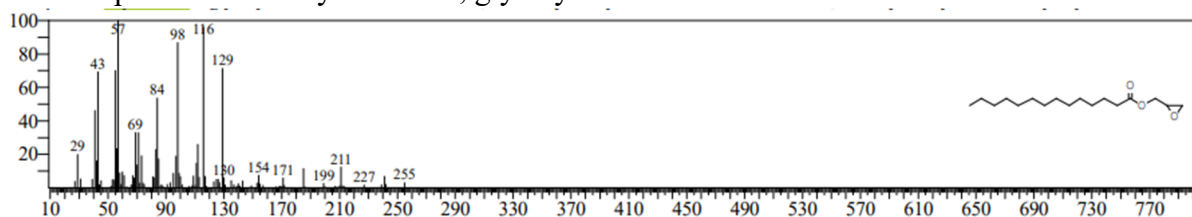

6. Compound name: 2-Propenoic acid, 3-(4-methoxyphenyl)

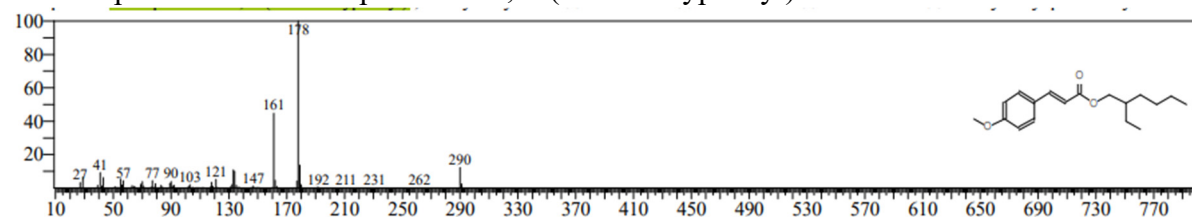

7. Compound name: 1,2,3,4-Tetrahydro-3- (phenyl acetamido) quinoline

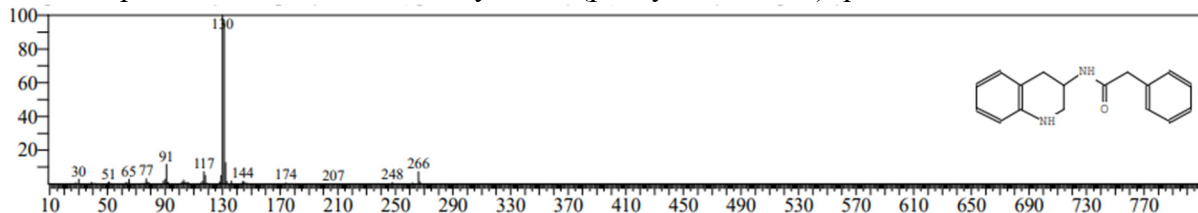

8. Compound name: 13-Docosenamide, (Z)- Erucylamide

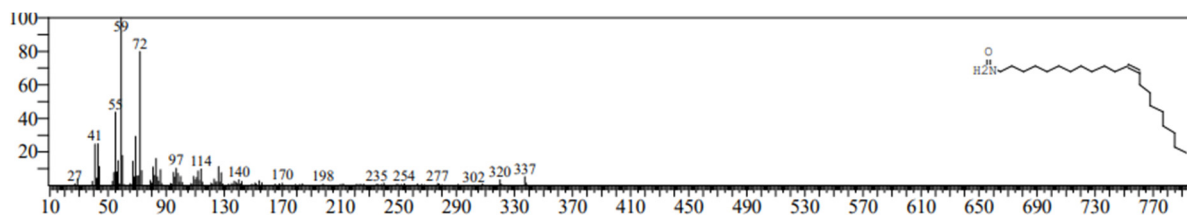

9. Compound name: Glycerol tri caprylate

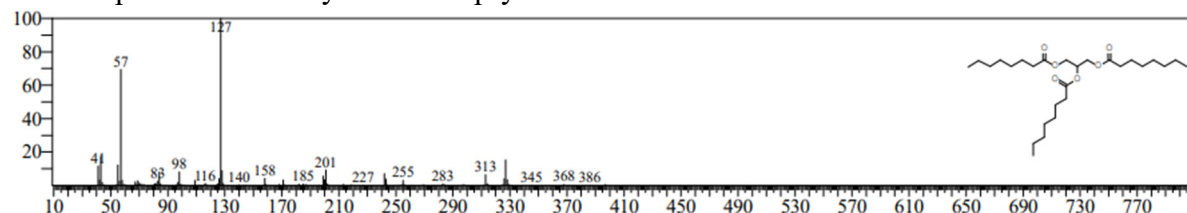

10. Compound name: 2-(Decanoyloxy) propane-1,3-diyl dioctanoate

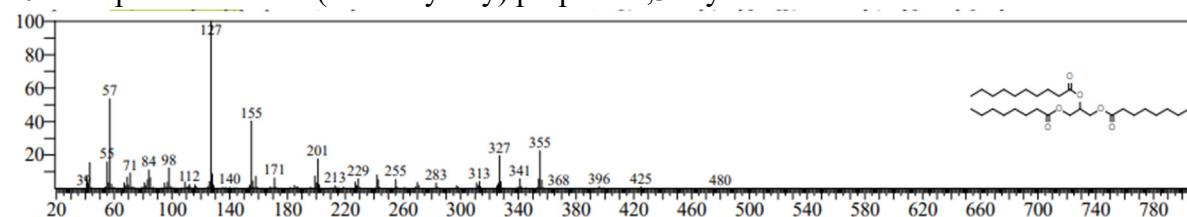

11. Compound name: Heptadecanoic acid, 16-methyl-, methyl ester

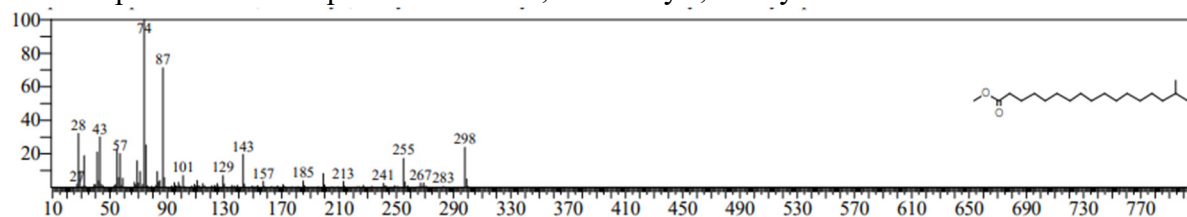

12. Compound name: Tetrapentacontane, 1,54-dibromo-

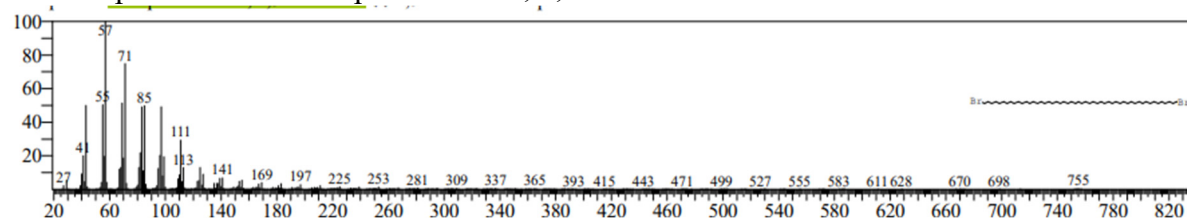

13. Compound name: Triacontyl heptafluorobutyrate

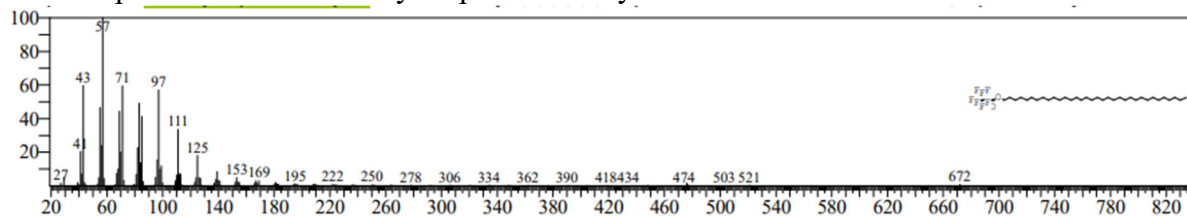

14. Compound name: Hexatriacontyl trifluoroacetate

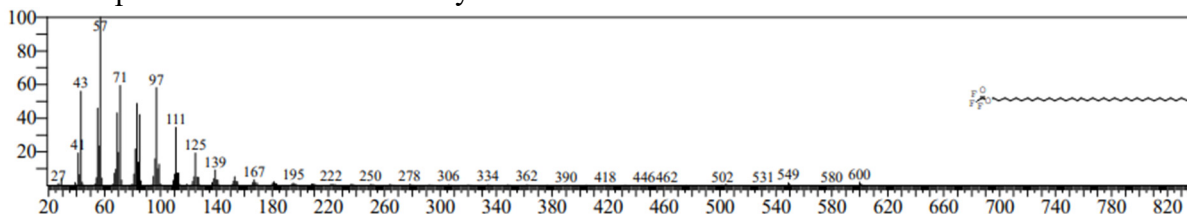

15. Compound name: 2-Ethylhexyl trans-4-methoxycinnamate

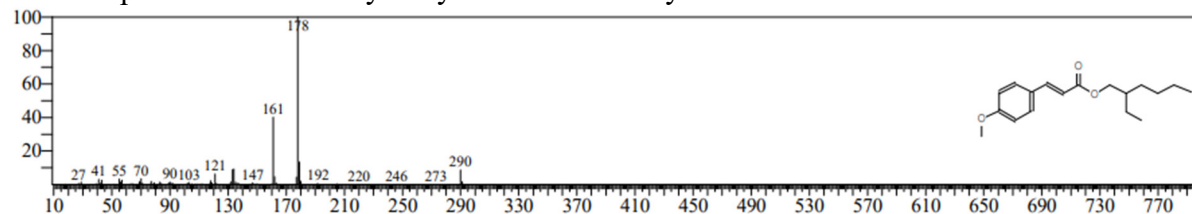

16. Compound name: 9-Octadecenamide

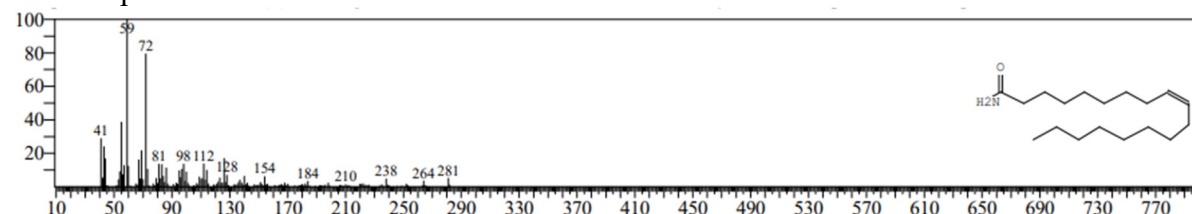

17. Compound name: 3-Indol-1-yl-propionic acid, methyl ester

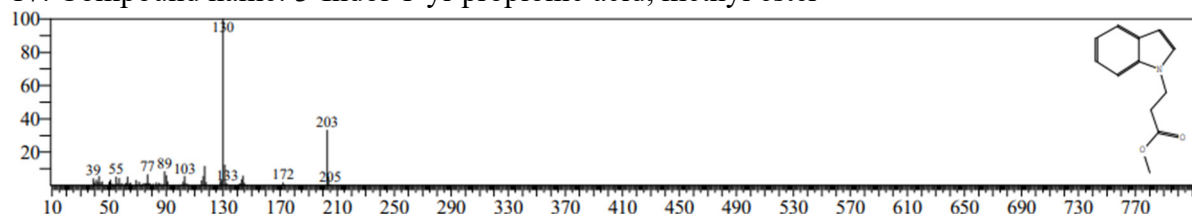

18. Compound name: 1,2,3,4-Tetrahydronaphthalen-1-yl 2,2,3,3,3-pentafluoropropanoate

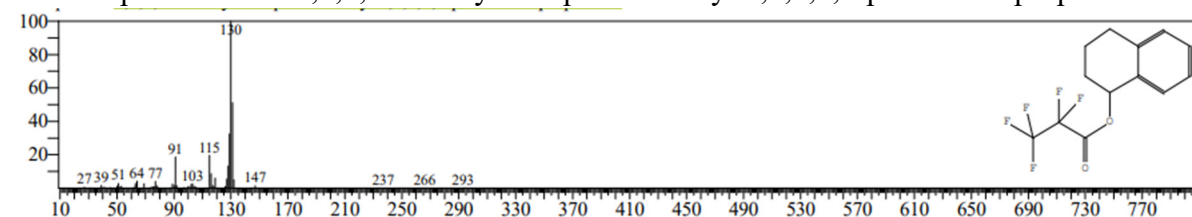

19. Compound name: L-Tryptophan, N-methyl-, methyl ester

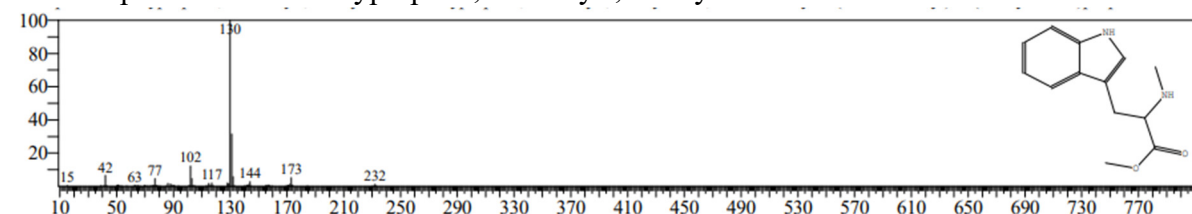

20. Compound name: 2-Ethylbutyric acid, eicosyl ester

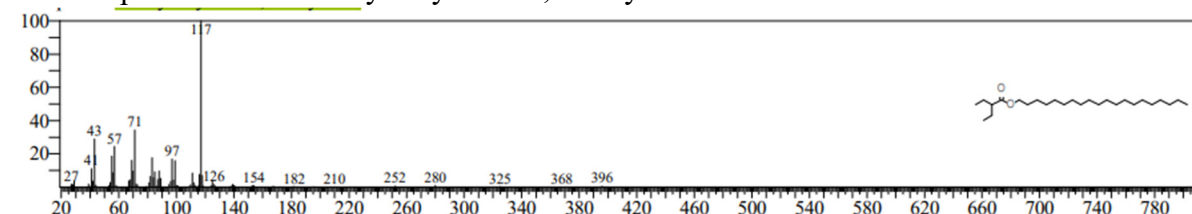

21. Compound name: Fumaric acid, 2,2,2-trichloroethyl tridecyl ester

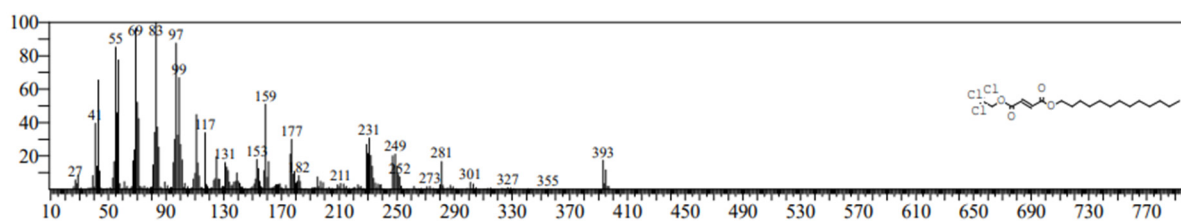

22. Compound name: Cyclooctadecane

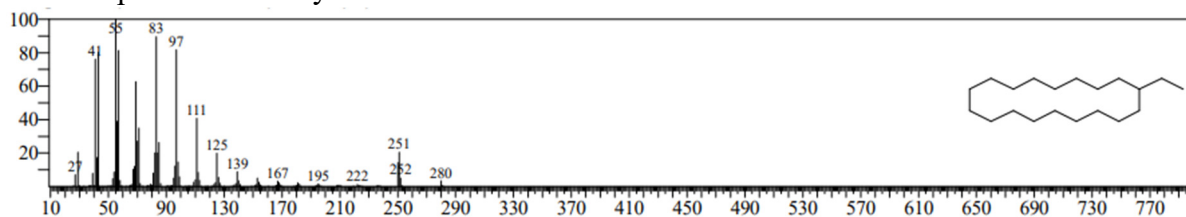

23. Compound name: 2,6,10,14,18-Pentamethyl-2,6,10,14,18-eicosapentaene

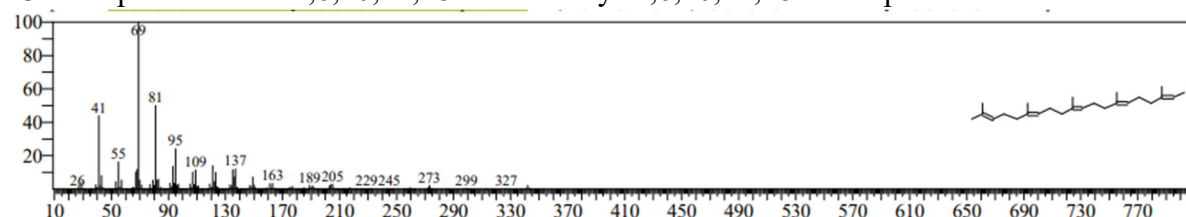

24. Compound name: 5,9,13,17-Tetramethyl 4,8,12,16-octadecatetraenoic acid

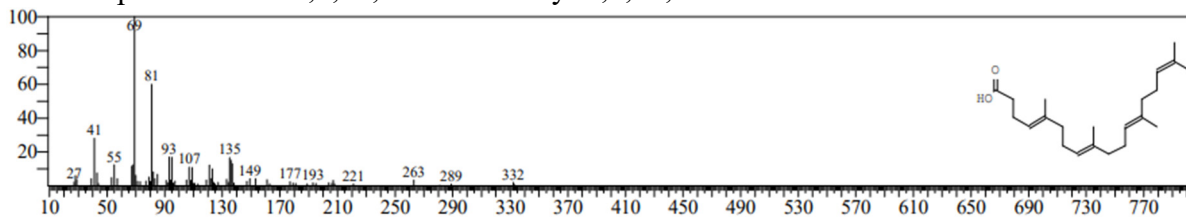

25. Compound name: 3-(Octanoyloxy)propane-1,2-diyl bis(decanoate)

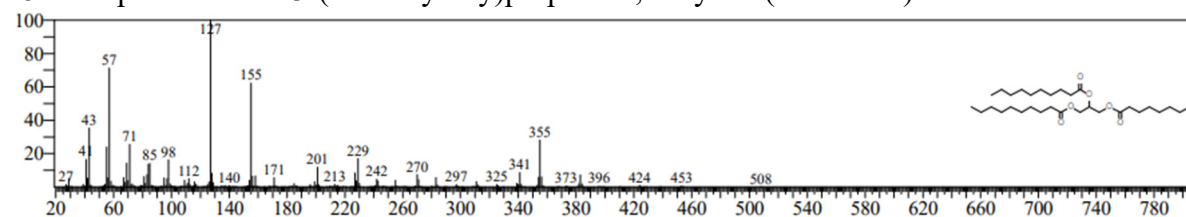

26. Compound name: Pentacyclo[19.3.1.1(3,7).1(9,13).1(15,19)]octacos-1(25),3,5,7(28),9,11,13(27),15,17,19(26),21,23-dodecaene-25,26,27,28-tetrol, 5,11,17,23-

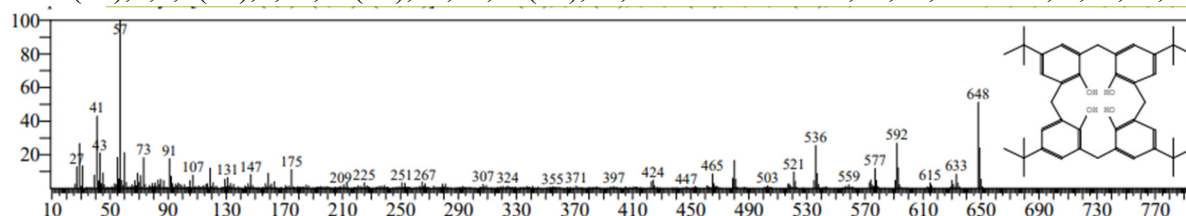



## Supplementary Material S2

### Mass fragmentation patterns and structural elucidations of common secondary metabolites secreted by *Serendipita indica* and *Zhihengliuella* sp. ISTPL4 under normal growth conditions and in the presence of arsenic stress

A total of 67 metabolites were produced by a combination of *S. indica* and *Z. sp.* ISTP4 under normal conditions and 37 metabolites were produced in As stress (out of which 16 metabolites were common)

#### 1. Compound name: 2,4-Di-tert-butyl-phenol) phosphate

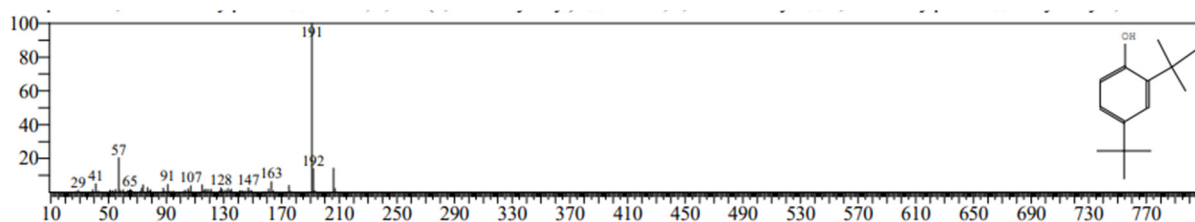

#### 2. Compound name: Cyclo(L-prolyl-L-valine)

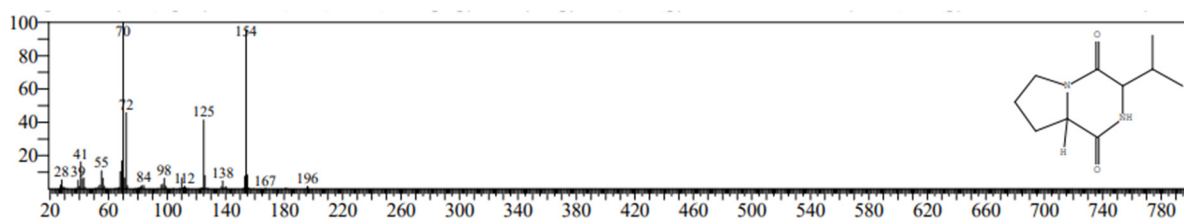

#### 3. Compound name: 1,2-Benzenedicarboxylic acid, bis (2-methyl propyl) ester

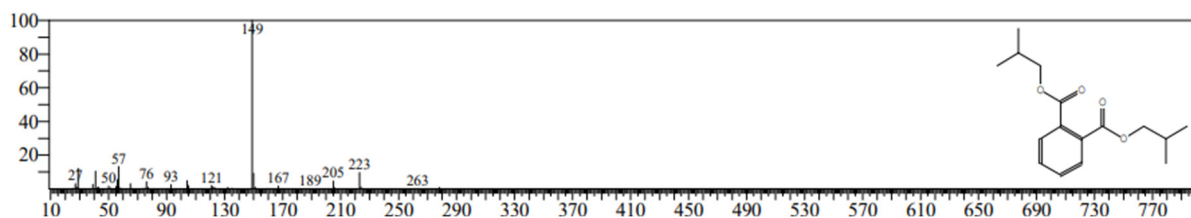

#### 4. Compound name: 7,9-Di-tert-butyl-1-oxaspiro (4,5) deca-a-6,9-diene-2,8-dione

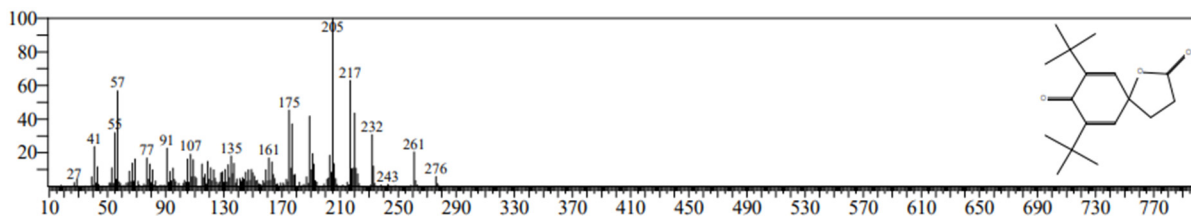

#### 5. Compound name: Hexadecenoic acid, methyl ester

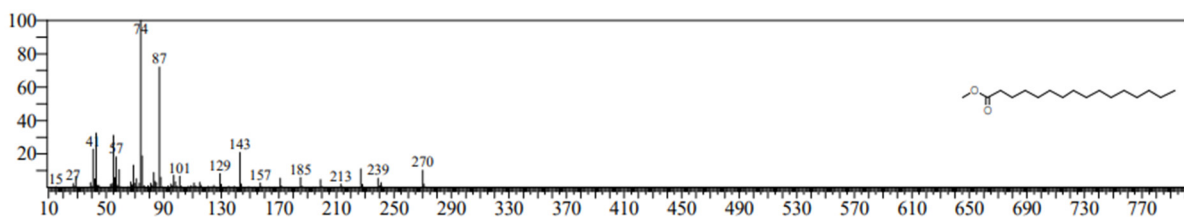

6. Compound name: octadecanoic acid, 3-oxo-, ethyl ester

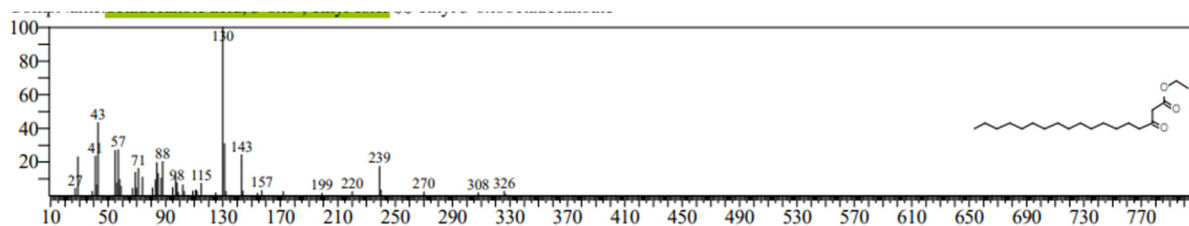

7. Compound name: Olean-18-ene

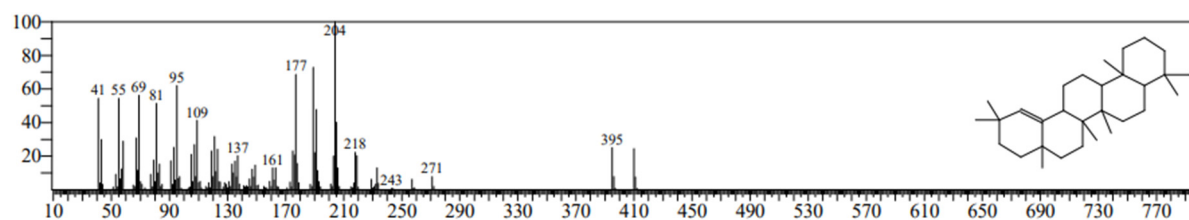

8. Compound name: L-Proline

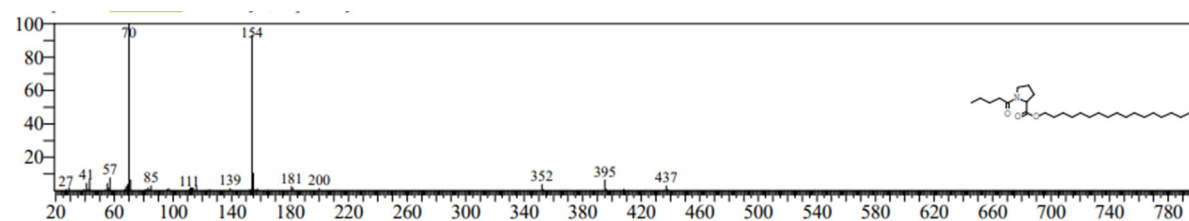

9. Compound name: Glycerol 1-palmitate

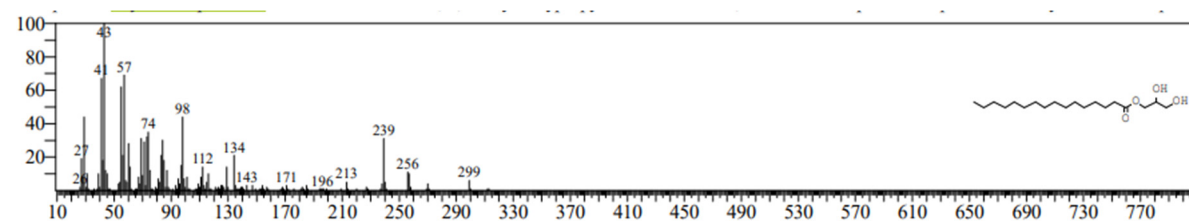

10. Compound name: Hexadecanoic acid, 2-hydroxy-1-(hydroxymethyl)ethyl ester

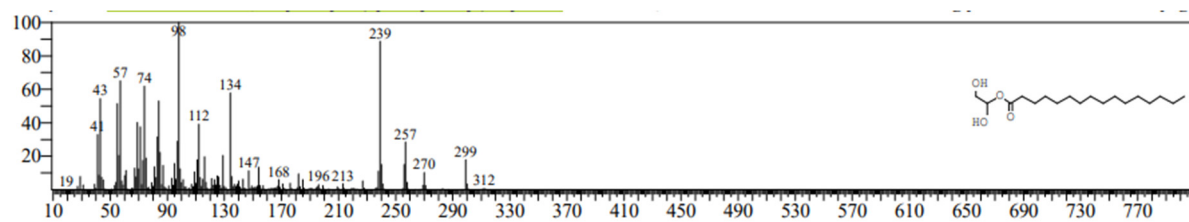

11. Compound name: Octadecanoic acid, 2,3-dihydroxypropyl ester

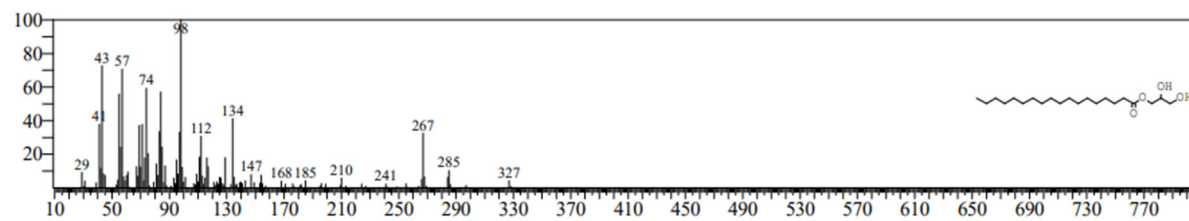

12. Compound name: Methyl stearate

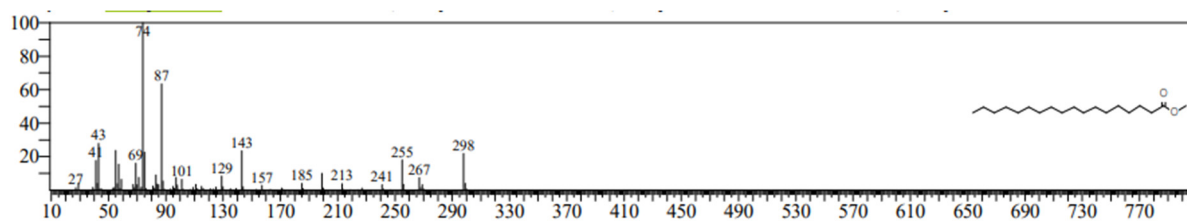

13. Compound name: Pyrrole[1,2-a] pyrazine-1,4-dione, hexahydro-3-(2-methylpropyl)

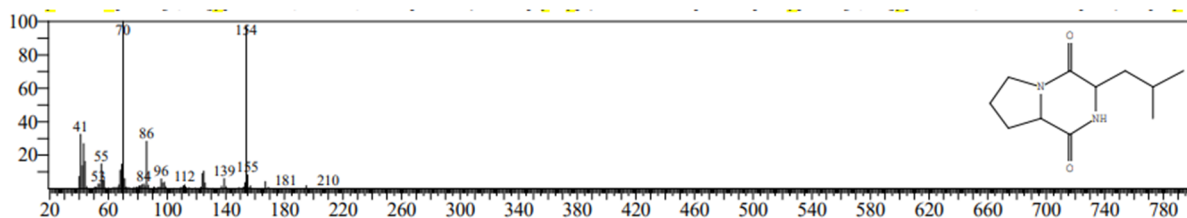

14. Compound name: Eicosane

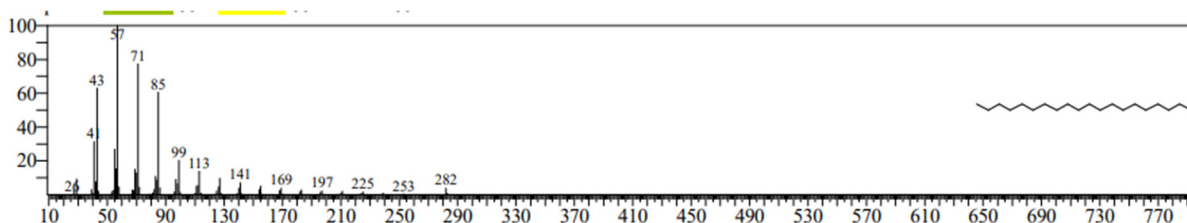

15. Compound name: Heneicosane

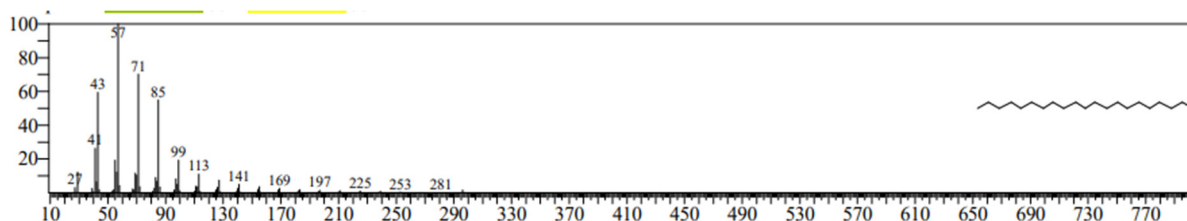

16. Compound name: Tetradecane

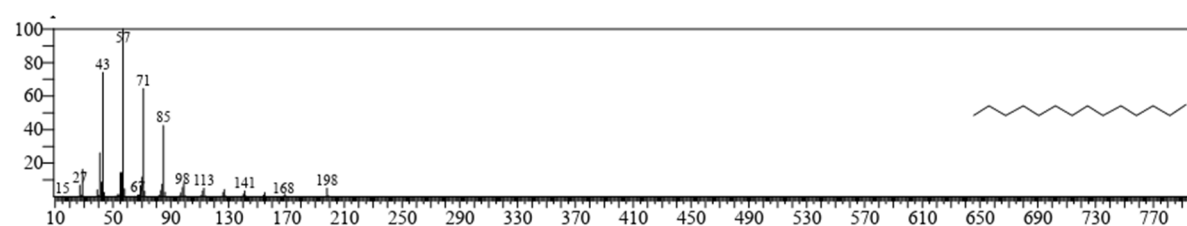

## Mass fragmentation patterns and structural elucidations of unique secondary metabolites secreted by *Serendipita indica* and *Zhihengliuella* sp. ISTPL4 under normal growth conditions

1. Compound name: Benzene, 1,3-bis(1,1-dimethylethyl)-

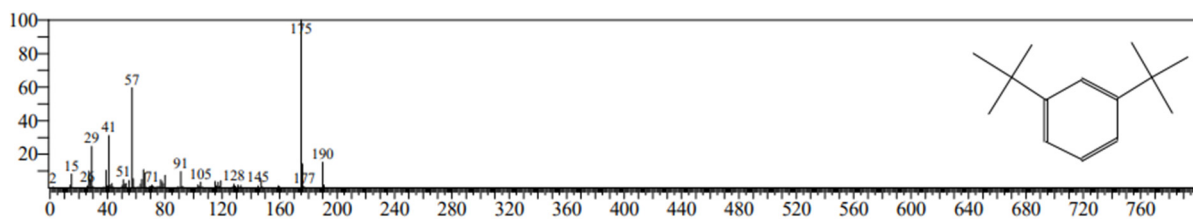

2. Compound name: Dodecane,4,6-dimethyl

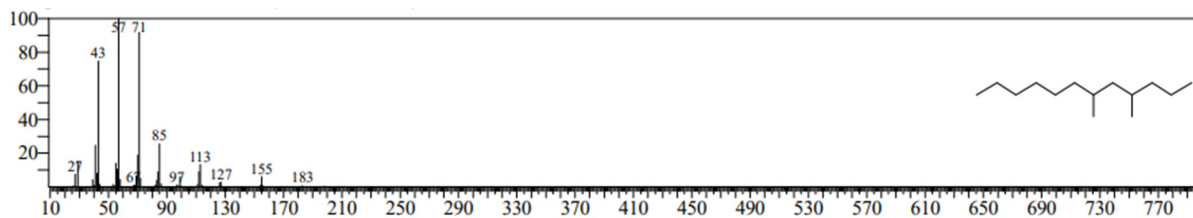

3. Compound name: Hexadecane

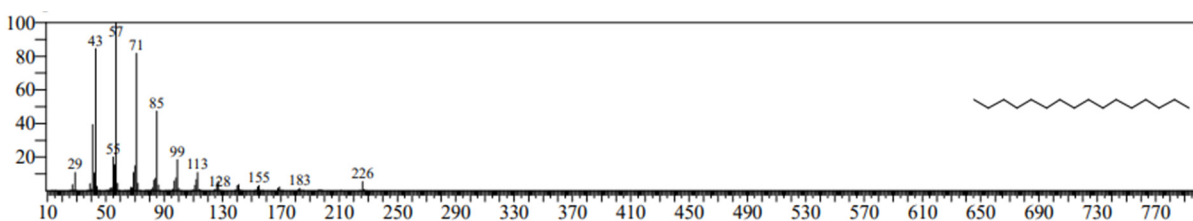

4. Compound name: Tetradecane

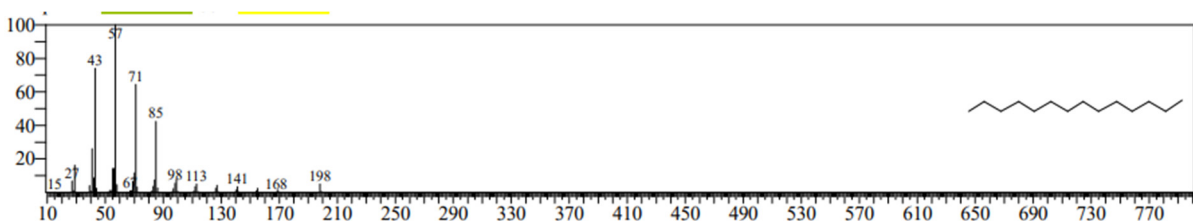

5. Compound name: Heptadecane

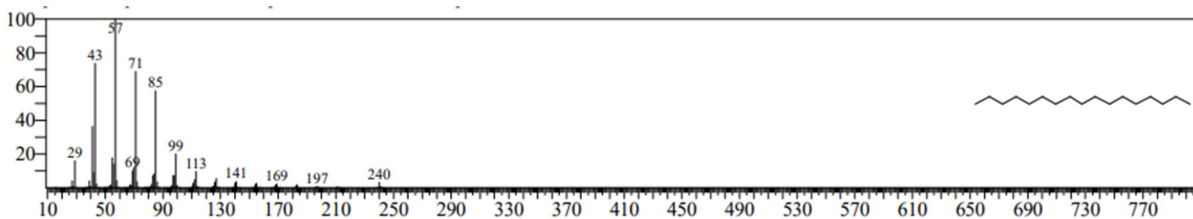

6. Compound name: I-Nonadecene

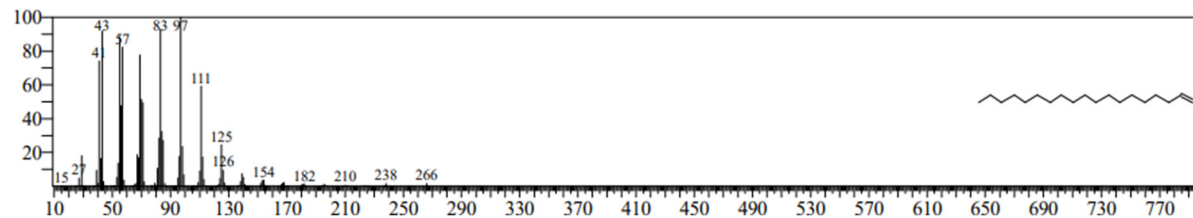

7. Compound name: Diethylpent-4-enylamine

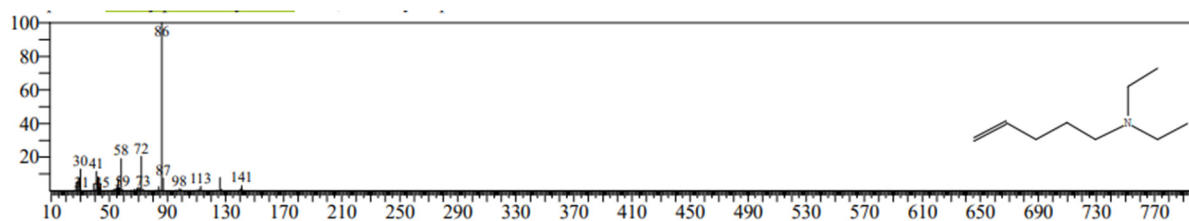

8. Compound name: 3,6-Diisopropylpiperazin-2,5-dione

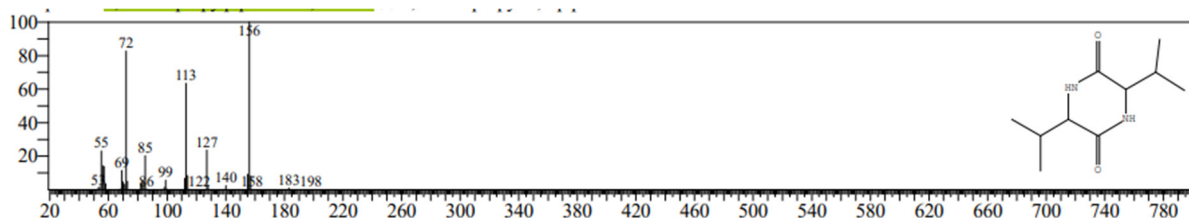

9. Compound name: Tetracosane

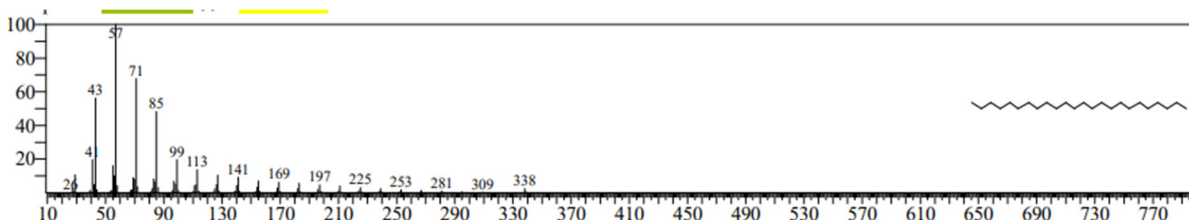

10. Compound name: 6,6-Diethyloctadecane

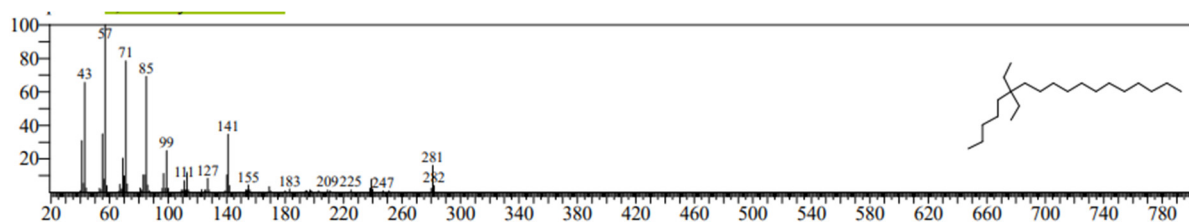

11. Compound name: n-Hexadecanoic acid methyl ester

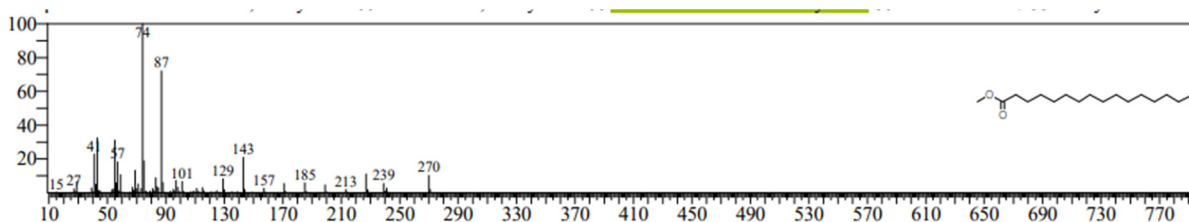

12. Compound name: 2-Methylhexacosane

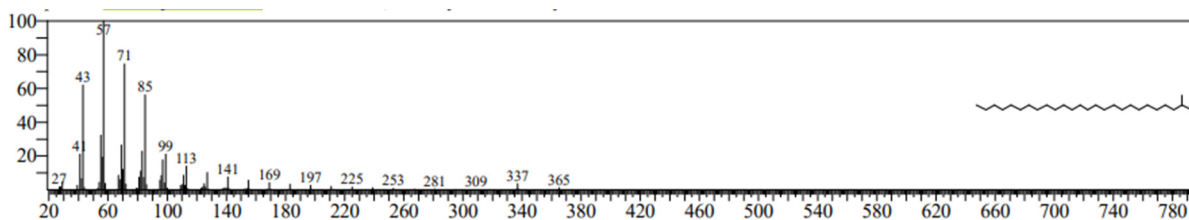

13. Compound name: Propionamide, N-propyl-N-decyl

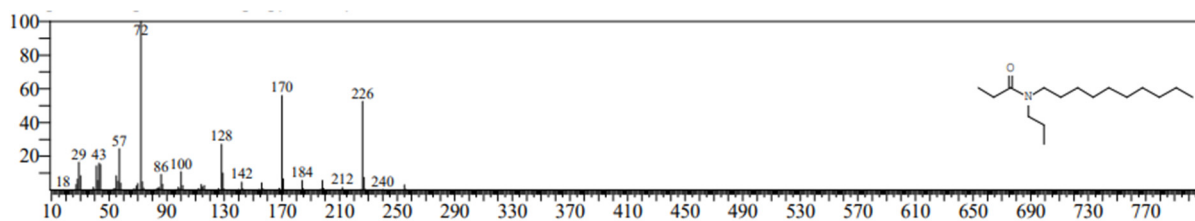

14. Compound name: Heneicosane, 10-methyl-

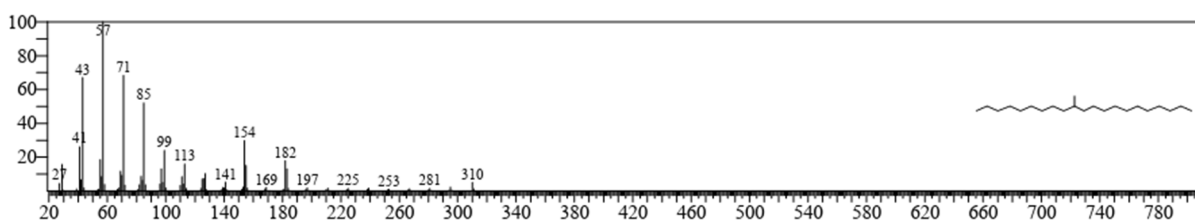

15. Compound name: Hexanoic acid, heptadecyl ester

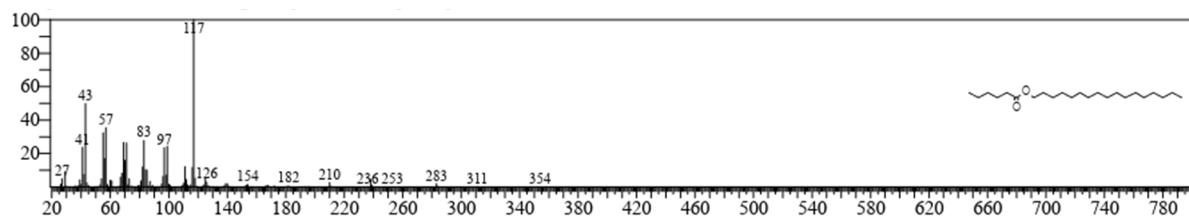

16. Compound name: Tetrapentacontane

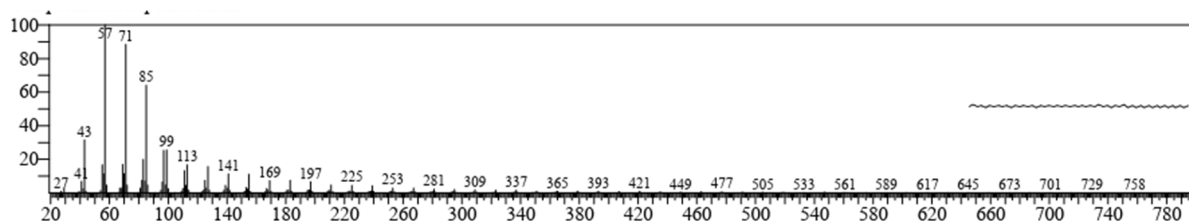

17. Compound name: 2-Methyltetracosane

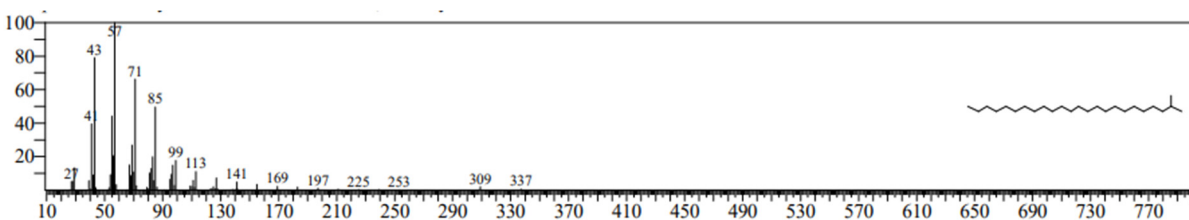

18. Compound name: Octadecane

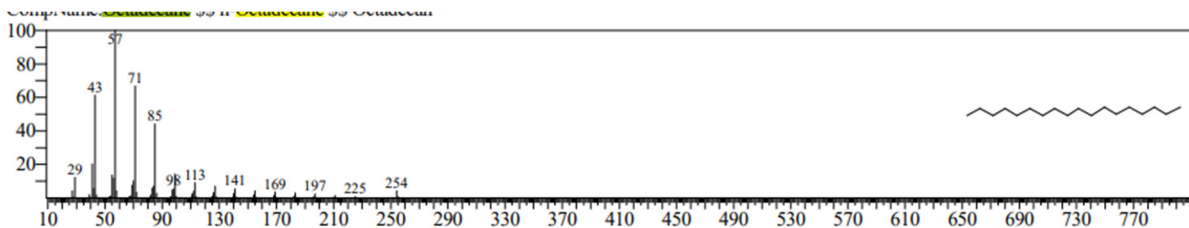

19. Compound name: 3-Eicosene, (E)-



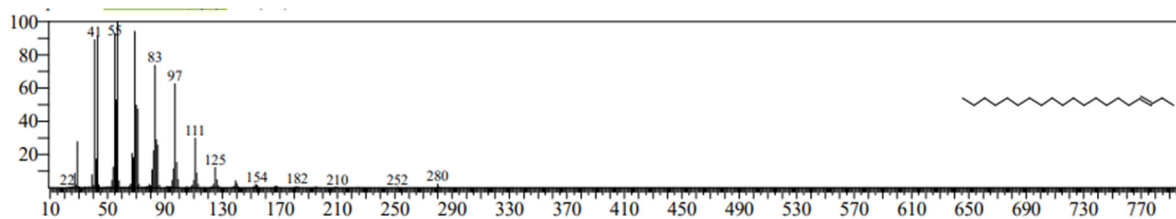

20. Compound name: Tetradecyl trifluoroacetate

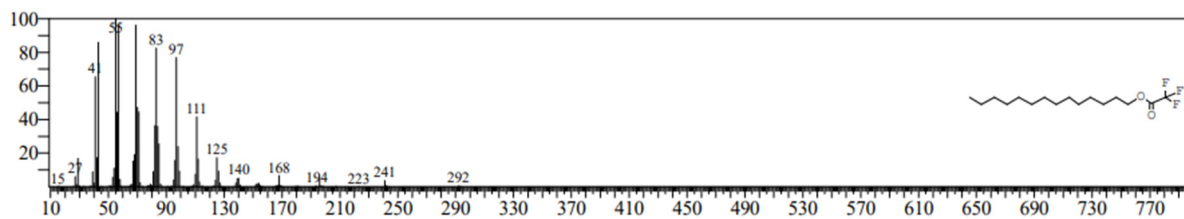

21. Compound name: Eicosane, 1-iodo

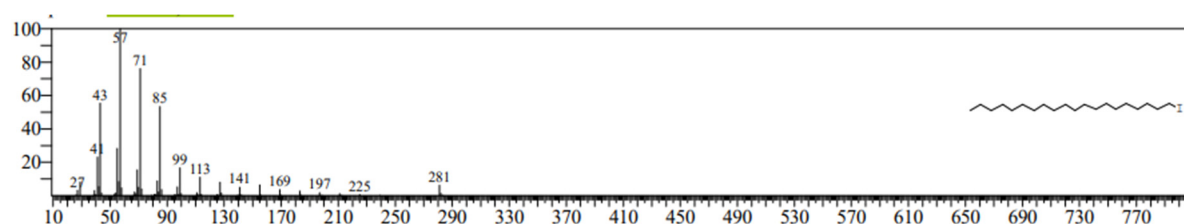

22. Compound name: Docosane

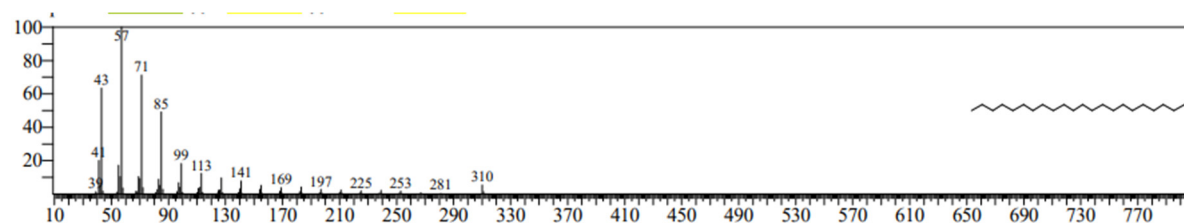

23. Compound name: Hexadecane, 2,6,10,14-tetramethyl

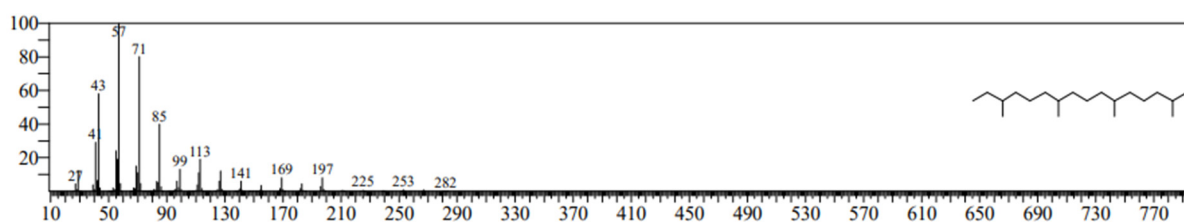

24. Compound name: 5,5-Diethylheptadecane

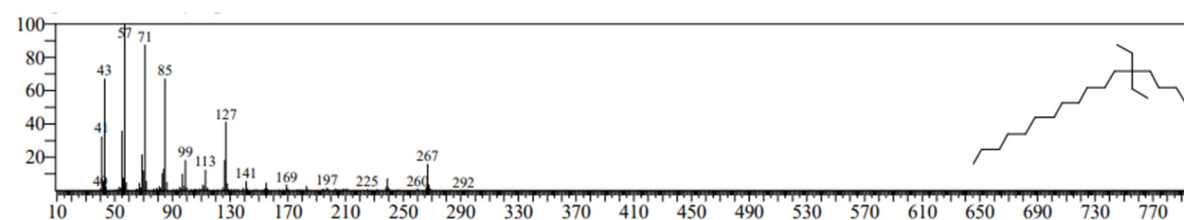

25. Compound name: Cyclopropanecarboxamide, N-(2-butyl)-N-propyl

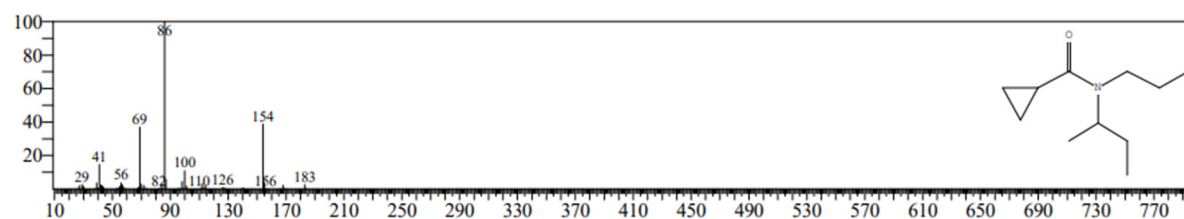

26. Compound name: Fumaric acid, 2-(diethylamino)ethyl tetradecyl ester

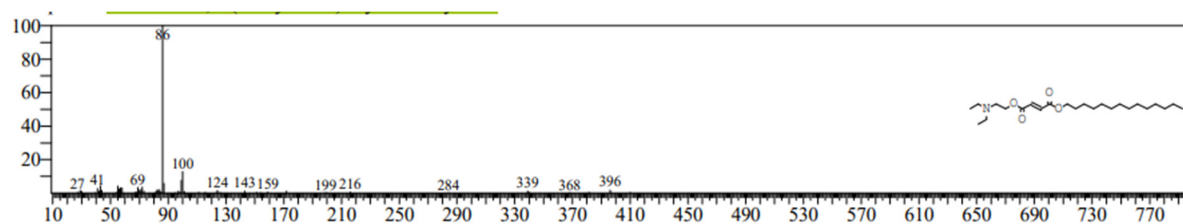

27. Compound name: 3,6-Diisopropylpiperazin-2,5-dione

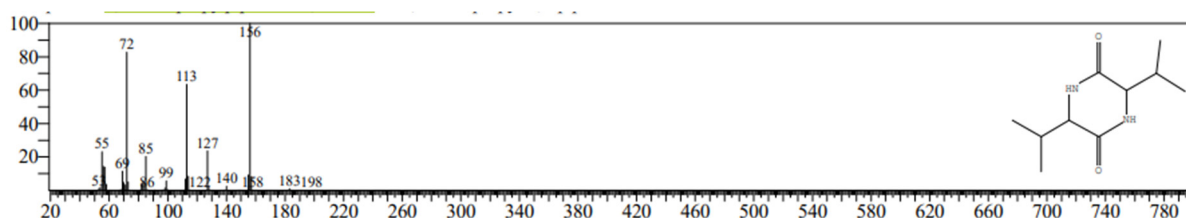

28. Compound name: Butylamine, N,N-dipentyl

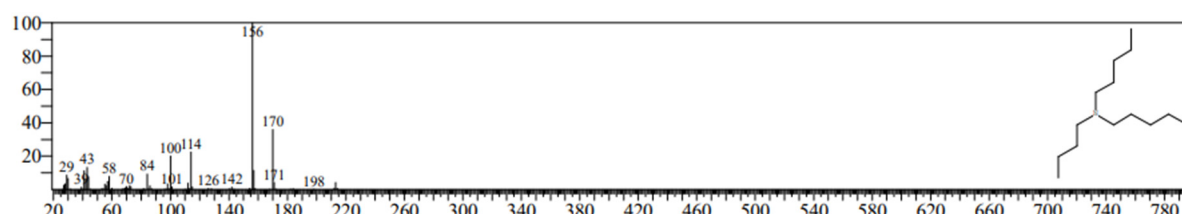

29. Compound name: 7-Ethyl-4,6-heptadecandione

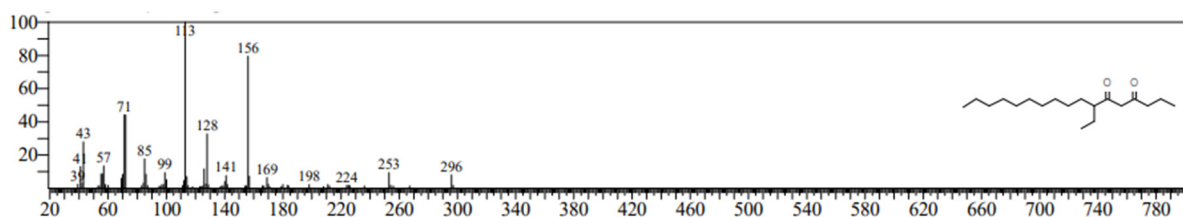

30. Compound name: 2-Diethylaminomethyl-3-hydroxy-6-hydroxymethyl-pyran-4-one

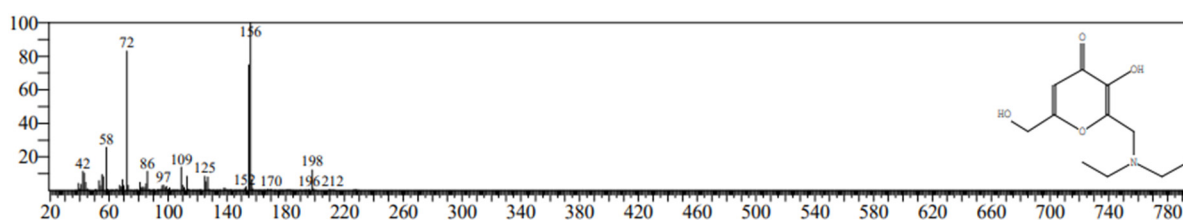

31. Compound name: Butylated Hydroxytoluene

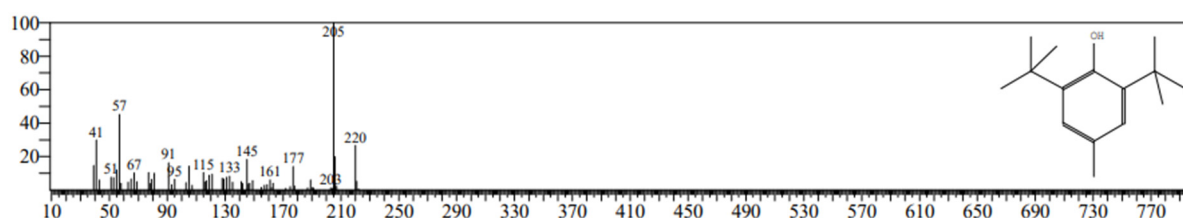

32. Common name: 6,6 Diethyloctadecane

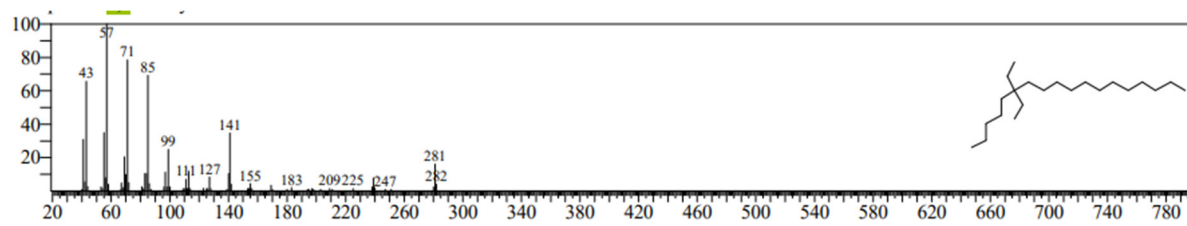

33. Compound name: l-Leucine

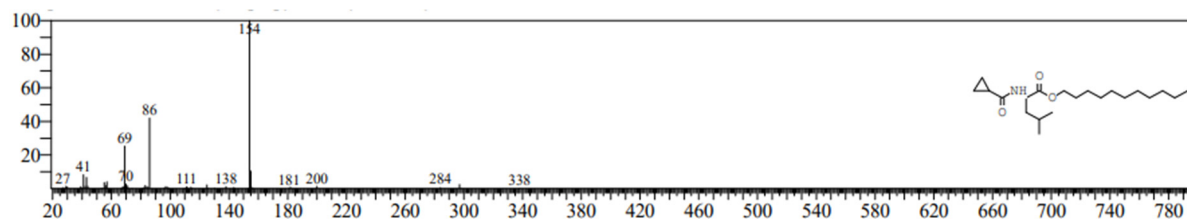

34. Compound name: l-(+)-Ascorbic acid 2,6-dihexadecanoate

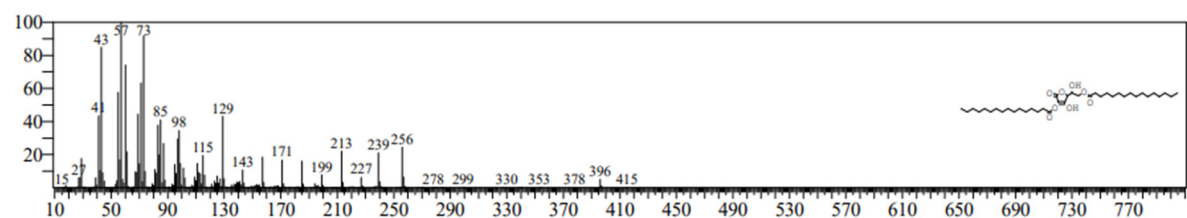

35. Compound name: 1-Heptacosanol

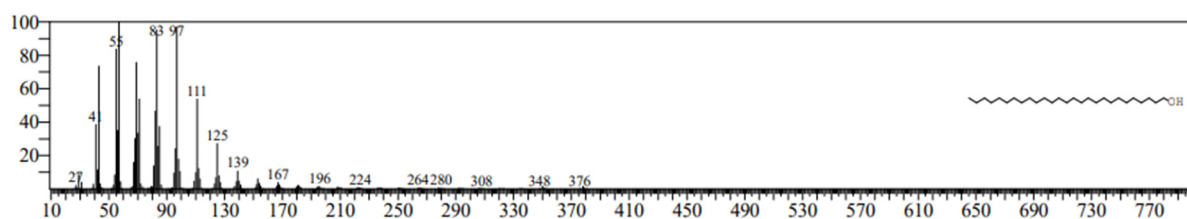

36. Compound name: 1-Heneicosanol

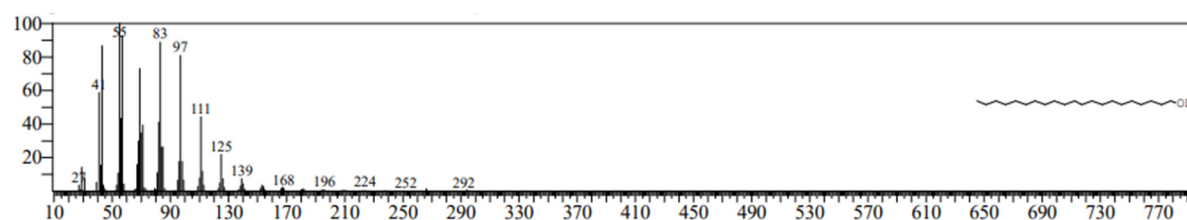

37. Compound name: Pentatriacontane

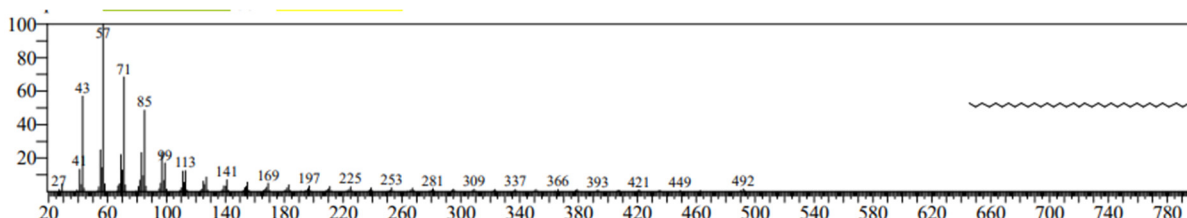

38. Compound name: Hexanamide, N-propyl-N-decyl

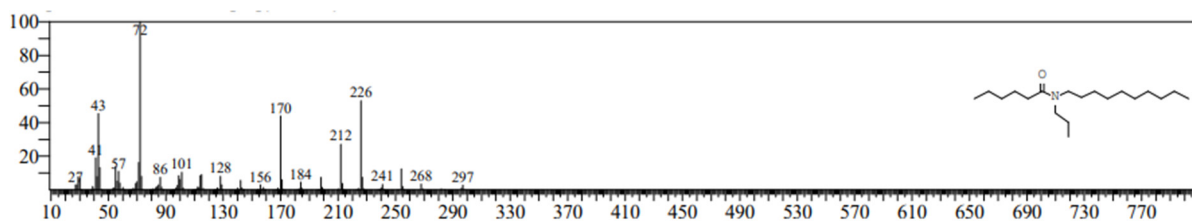

39. Compound name: Acetamide, N-propyl-N-decyl

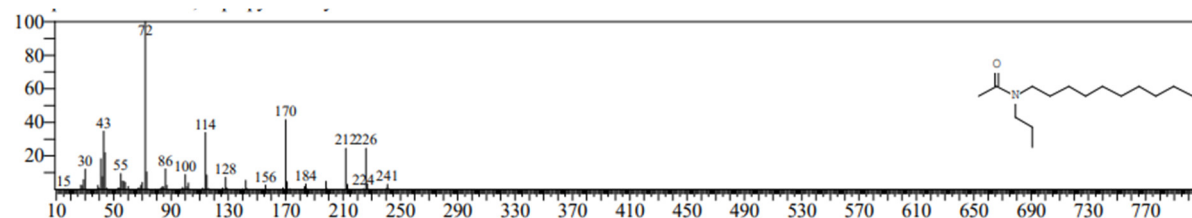

40. Compound name: Octanamide, N-propyl-N-decyl

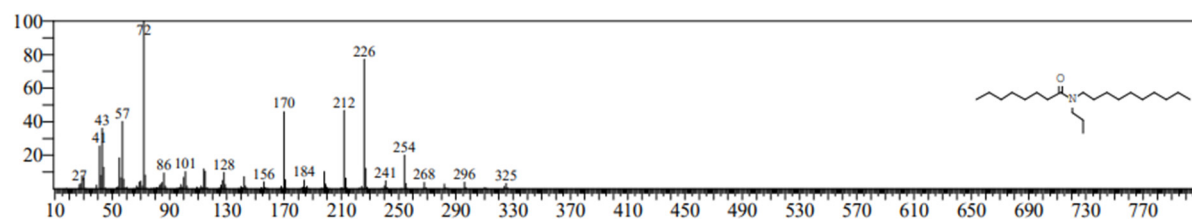

41. Compound name: Benzene, (2,3-dimethyldecyl)-

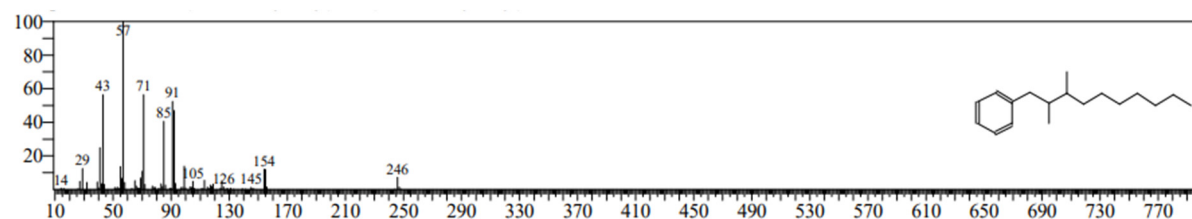

42. Compound name: Acridin-9-yl-[1,2,4]triazol-4-yl-amine

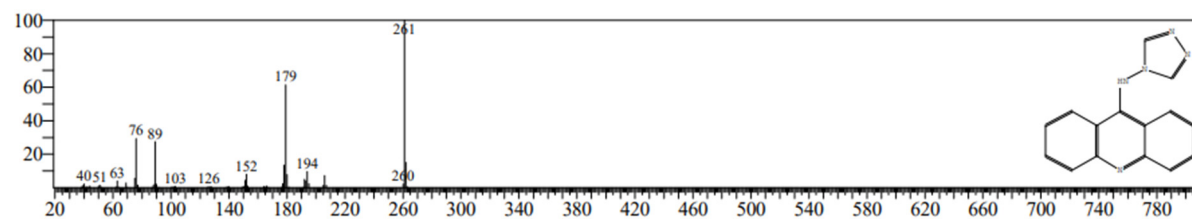

43. Compound name: 1,1'-Biphenyl, 4,4'-bis(bromomethyl)-

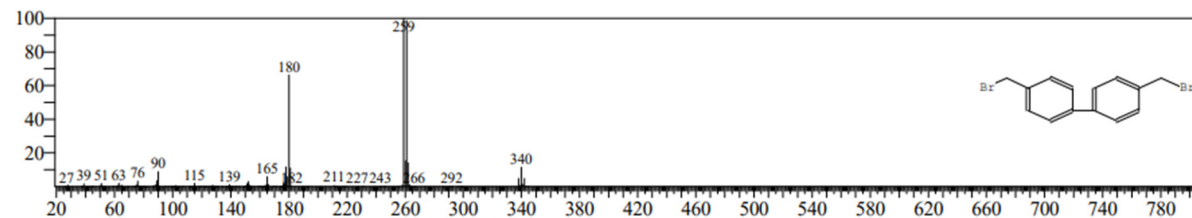

44. Compound name: Silane, trimethyl(3,5-xylyloxy)-

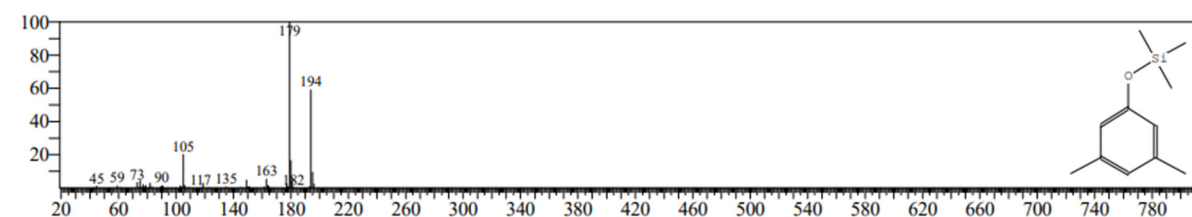

45. Compound name: Eicosyl nonyl ether

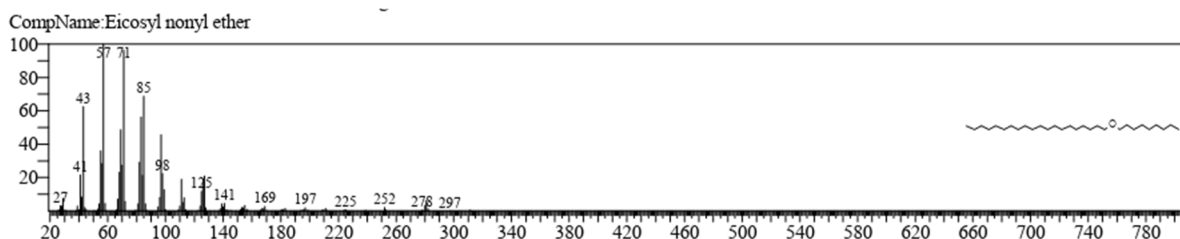

46. Compound name: Ergotaman-3',6',18-trione, 9,10-dihydro-12'-hydroxy-2'-methyl-5'-(phenylmethyl)-, (5'.alpha.,10.alpha.)-

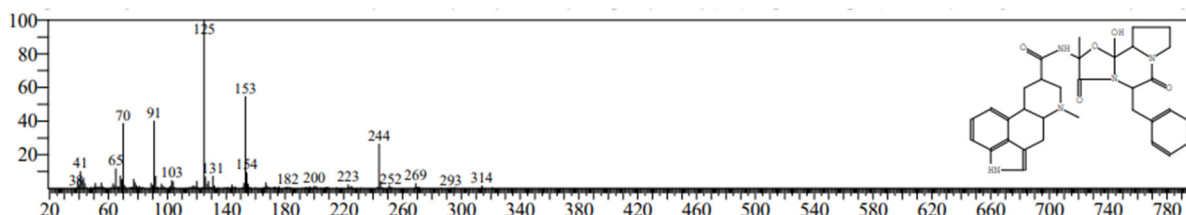

47. Compound name: 1,3-Dipalmitin, TMS derivative

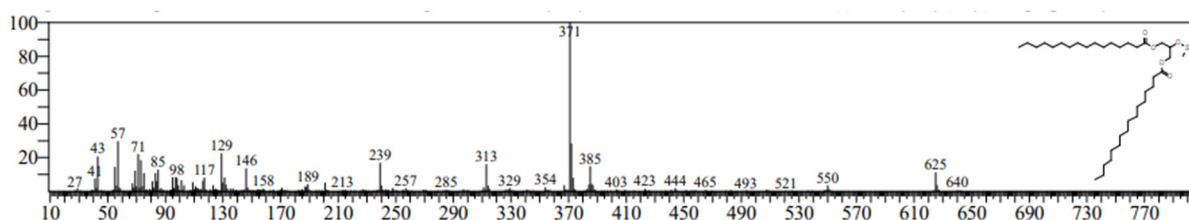

48. Compound name: 11-Methylpentacosane

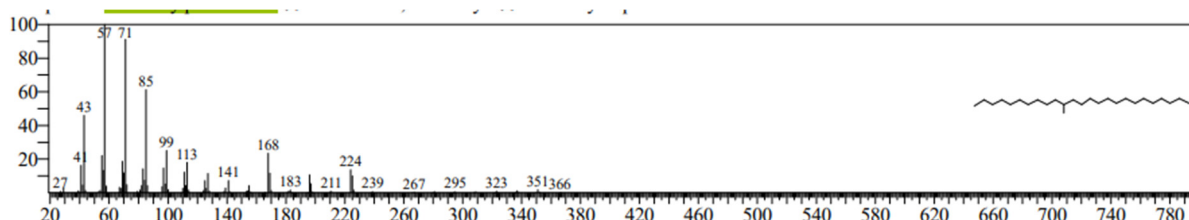

**Mass fragmentation patterns and structural elucidations of unique secondary metabolites secreted by *Serendipita indica* and *Zhihengliuella* sp. ISTPL4 in presence of arsenic stress**

1. Compound name: d-Ribose, 2-deoxy-bis(thioheptyl)-dithioacetal

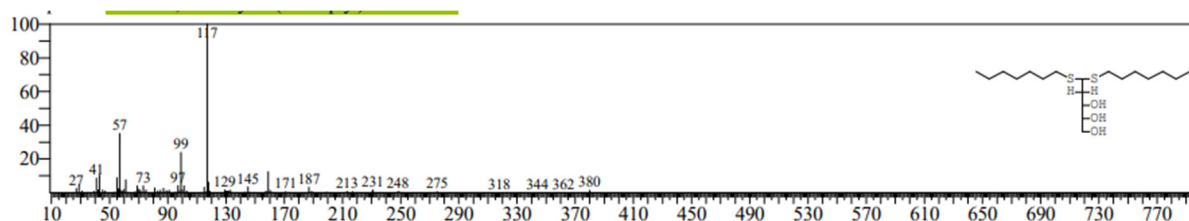

2. Compound name: Phenol, 2,4-bis(1,1-dimethylethyl)-, phosphite

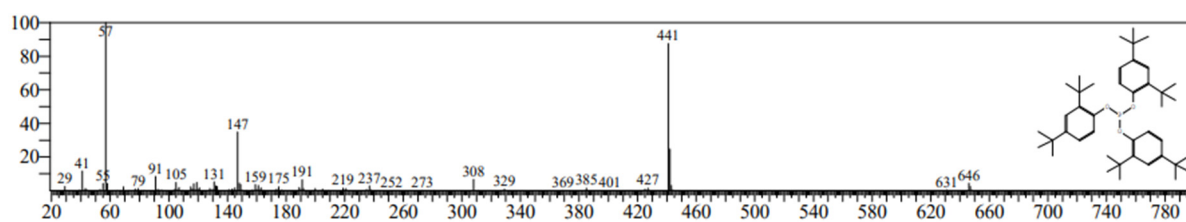

3. Compound name: Heptadecane, 8-methyl

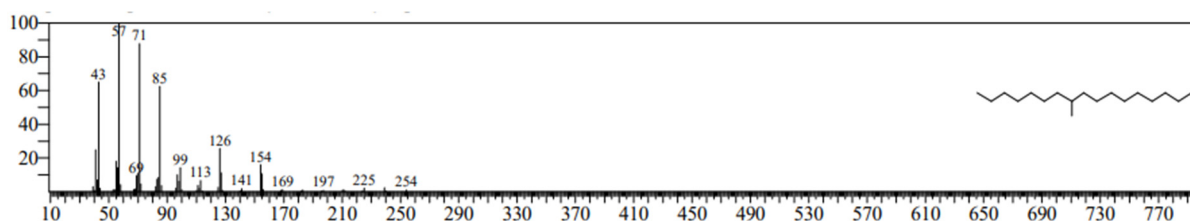

4. Compound name: 2,6,10-Trimethyltridecane

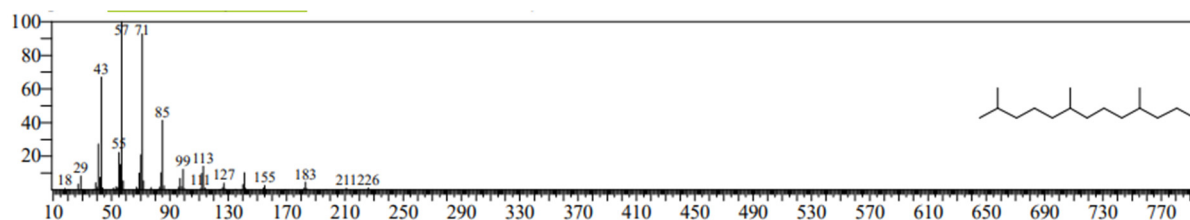

5. Compound name: Phenol, 2,5-bis(1,1-dimethylethyl)-

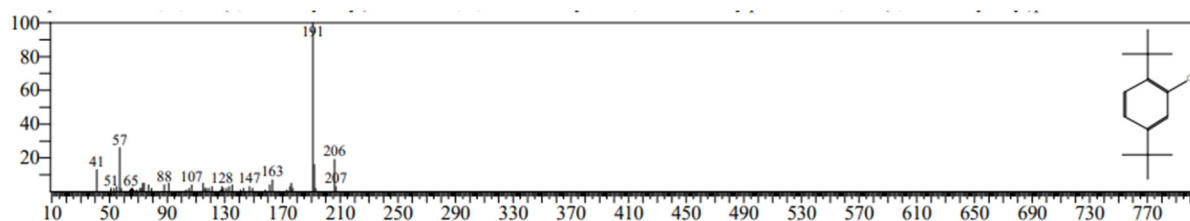

6. Compound name: 5-Azacytosine, N,N,O-trimethyl

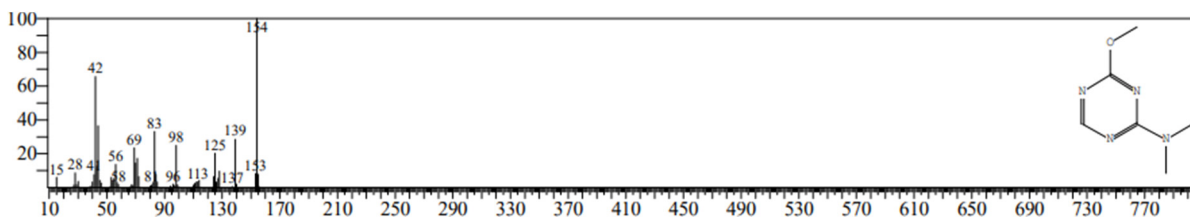

7. Compound name: Butylated Hydroxytoluene

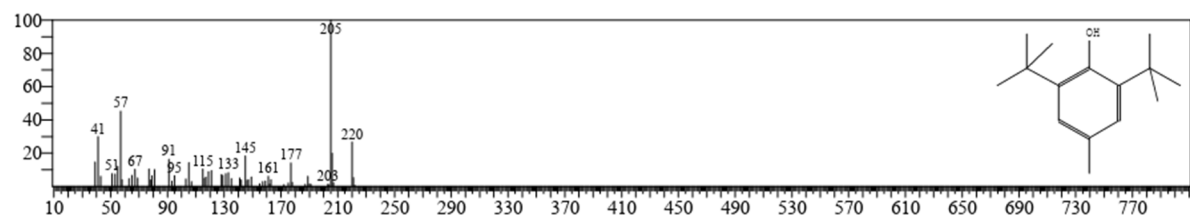

8. Compound name: 5-Nitroso-2,4,6-triaminopyrimidine



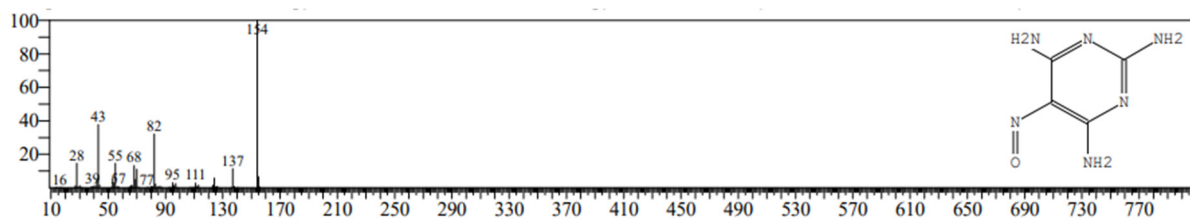

9. Compound name: Heptadecanoic acid, 16-methyl-, methyl ester

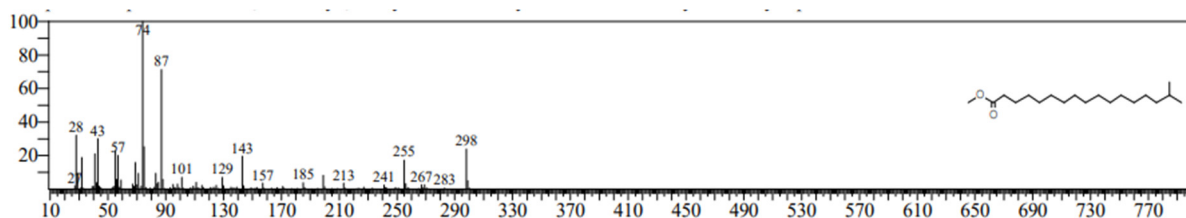

10. Compound name: 1,3,5-Trisilacyclohexane

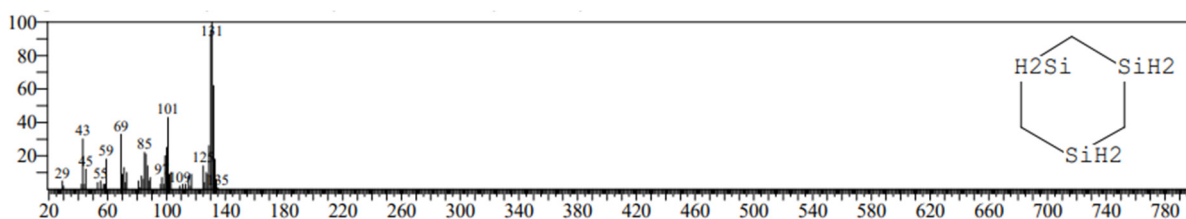

11. Compound name: 1,3-Dipalmitin, TMS derivative

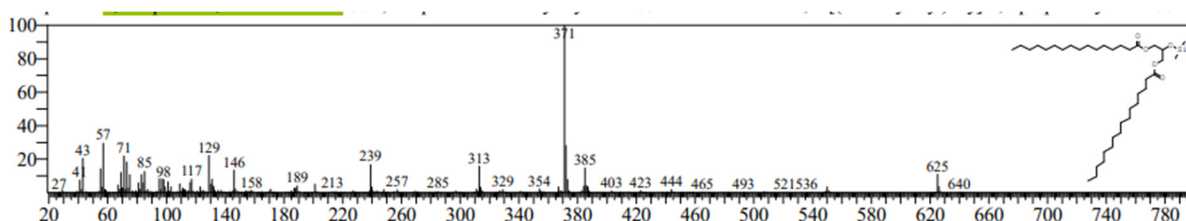

12. Compound name: Tridecanoic acid, 2-ethyl-2-methyl-, ethyl ester

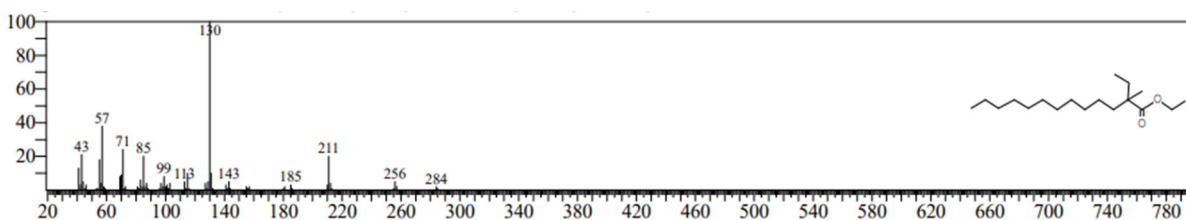

13. Compound name: Formamide, N-(4-[2-(1,1-dimethylethyl)-5-oxo-1,3-dioxolan-4-yl]butyl)

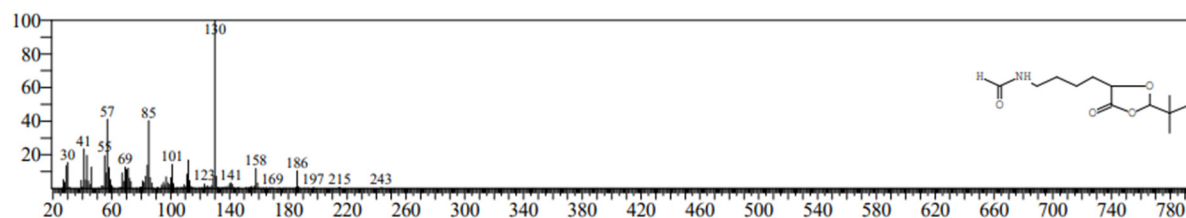

14. Compound name: d-Ribose, 2-deoxy-bis(thioheptyl)-dithioacetal

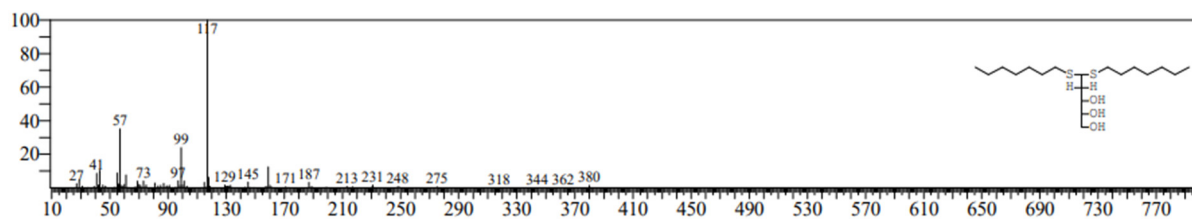

15. Compound name: Hexadecanoic acid, 2-hydroxy-1-(hydroxymethyl)ethyl ester

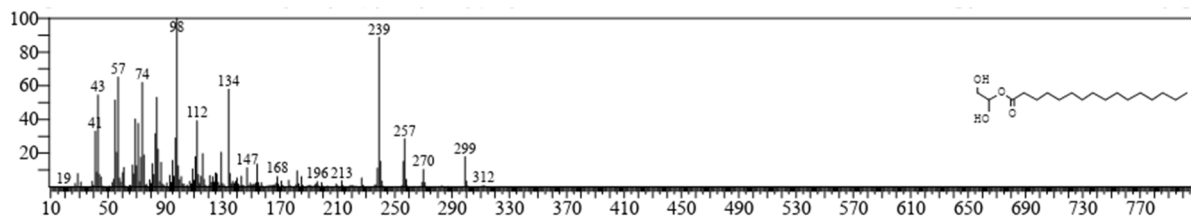

16. Compound name: 1H-Indene, 1-hexadecyl-2,3-dihydro

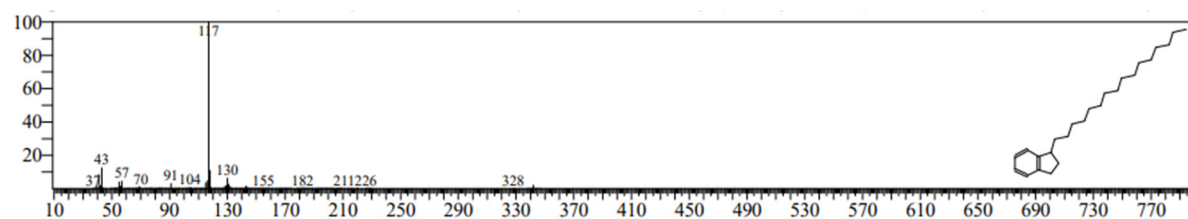

17. Compound name: Ethyl 3-hydroxytetracosanoate

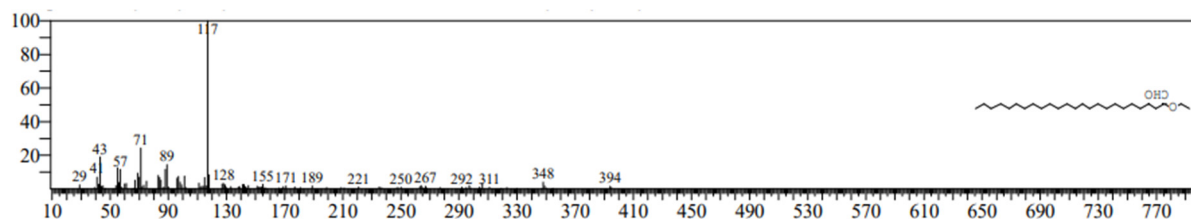

18. Compound name: Palmitic Acid, TMS derivative

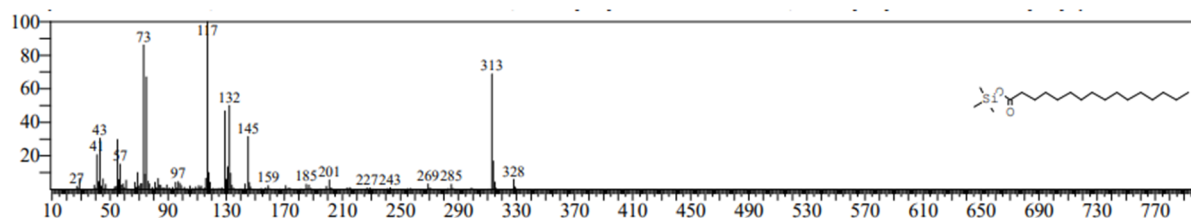

19. Compound name: Silane, diethylheptyloxyoctadecyloxy

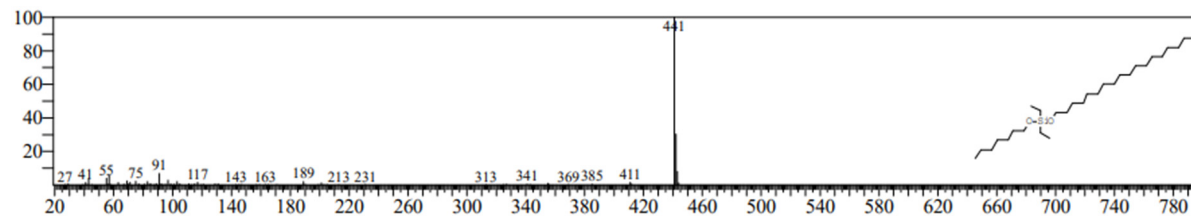

20. Compound name: Silane, dimethyl(docosyloxy)butoxy

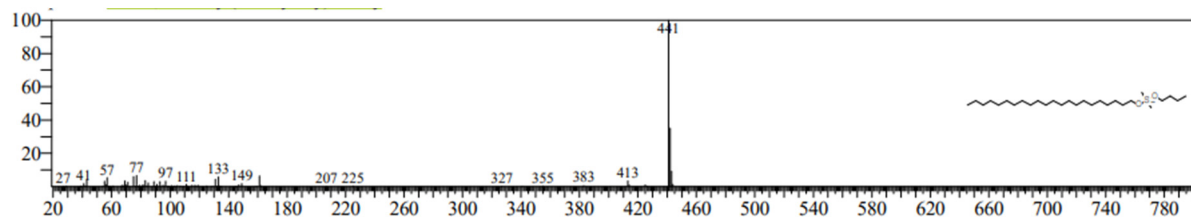

21. Compound name: Quercetin, 5TMS derivative

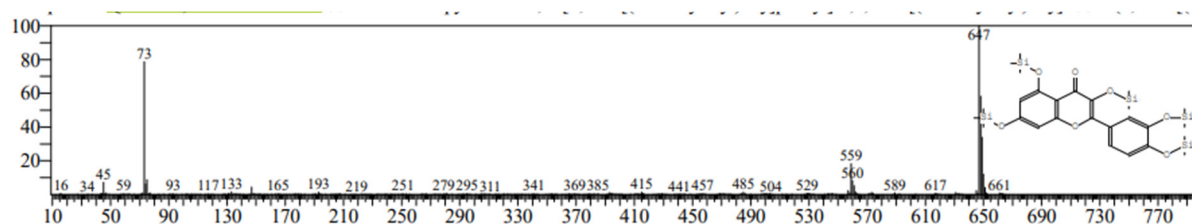

22. Compound name: Pentacyclo[19.3.1.1(3,7).1(9,13).1(15,19)]octacos-1(25),3,5,7(28),9,11,13(27),15,17,19(26),21,23-dodecaene-25,26,27,28-tetrol, 5,11,17,23-te

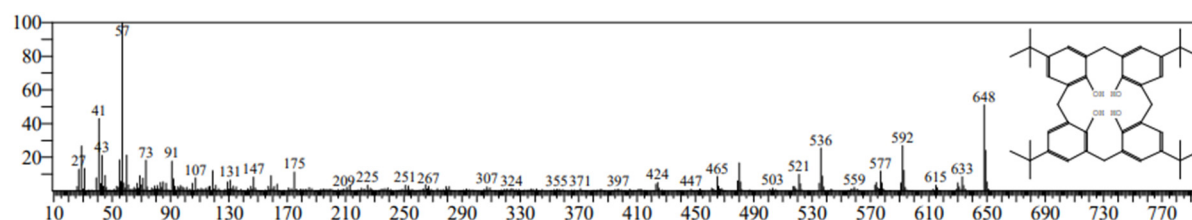

**Table S1.** Secondary metabolites production in *Serendipita indica* under normal conditions

| S. No | Metabolites                             | Area % | Retention time | Molecular formula                                             | Molecular weight | Functions                                                                                                                  |
|-------|-----------------------------------------|--------|----------------|---------------------------------------------------------------|------------------|----------------------------------------------------------------------------------------------------------------------------|
| 1     | Olean-18-ene                            |        | -              | C <sub>30</sub> H <sub>50</sub>                               | 410              | Antiviral activity [22]                                                                                                    |
| 2     | L-Leucine                               |        |                | C <sub>21</sub> H <sub>39</sub> NO <sub>3</sub>               | 353              | L-Leucine can be assimilated by bacteria when sugars or other preferential carbon sources in the habitat are depleted [23] |
| 3     | L-Proline                               |        | -              | C <sub>27</sub> H <sub>51</sub> NO <sub>3</sub>               | 437              | Antioxidant activity and protect plants under stress conditions [24]                                                       |
| 4     | L-(+)-Ascorbic acid 2,6-dihexadecanoate |        | -              | C <sub>38</sub> H <sub>68</sub> O <sub>8</sub>                | 652              | Antimicrobial activity [25]                                                                                                |
| 5     | Heptadecyl trifluoroacetate             | -      | -              | C <sub>19</sub> H <sub>35</sub> F <sub>3</sub> O <sub>2</sub> | 352              | Antioxidant activity [26]                                                                                                  |
| 6     | 5,5-Diethylpentadecane                  | -      | -              | C <sub>19</sub> H <sub>40</sub>                               | 268              | Antimicrobial activity [27]                                                                                                |
| 7     | Cyclo(L-prolyl-L-valine)                | 1.82   | 16.783         | C <sub>10</sub> H <sub>16</sub> N <sub>2</sub> O <sub>2</sub> | 196              | It is a metabolite involved in the signaling process by releasing AHL. [28]                                                |
| 8     | Heneicosane                             | 0.13   | 14.893         | C <sub>21</sub> H <sub>44</sub>                               | 296              | Antimicrobial activity against <i>Streptococcus</i>                                                                        |

|    |                                                                                    |       |        |                                                               |     |                                                                                     |
|----|------------------------------------------------------------------------------------|-------|--------|---------------------------------------------------------------|-----|-------------------------------------------------------------------------------------|
|    |                                                                                    |       |        |                                                               |     | <i>pneumoniae</i> and <i>Aspergillus fumigatus</i> [29,44]                          |
| 9  | Ergotaman-3',6',18-trione                                                          |       |        | C <sub>33</sub> H <sub>37</sub> N <sub>5</sub> O <sub>5</sub> | 583 | Antimicrobial activity [30]                                                         |
| 10 | Glycine                                                                            | -     | -      | C <sub>10</sub> H <sub>19</sub> NO <sub>4</sub>               | 217 | It is a proteinogenic amino acids which help in abiotic stress in plant [31]        |
| 11 | Quinoline-4-carboxamide 2-phenyl-N-n.-octyl                                        | -     | -      | C <sub>24</sub> H <sub>28</sub> N <sub>2</sub> O              | 360 | Antibacterial activity [32]                                                         |
| 12 | Phenol, 2,4-bis (1,1-dimethyl ethyl)-, phosphite                                   | 13.23 | 32.943 | C <sub>42</sub> H <sub>63</sub> O <sub>3</sub> P              | 646 | Antioxidant and antifungal activity [33]                                            |
| 13 | Lycopene                                                                           | -     | -      | C <sub>40</sub> H <sub>66</sub>                               | 546 | Anticancer agent [38]                                                               |
| 14 | Methanone, (3,5-dimethyl-1-piperidyl)(2-phenyl-4-quinoliny)-                       | -     | -      | C <sub>23</sub> H <sub>24</sub> N <sub>2</sub> O              | 344 | Antioxidant activity [79]<br>It generated NO and ROS during stress in plant [33,79] |
| 15 | Formamide, N-(4-[2-(1,1-dimethylethyl)-5-oxo-1,3-dioxolan-4-yl]butyl)              |       |        | C <sub>12</sub> H <sub>21</sub> NO <sub>4</sub>               | 243 | Antimicrobial activity [41]                                                         |
| 16 | 2-(4-Hydroxy-4-methyl-tetrahydro-pyran-3-ylamino)-3-(1H-indol-2-yl)-propionic acid | -     | -      | C <sub>17</sub> H <sub>22</sub> N <sub>2</sub> O <sub>4</sub> | 318 | Probiotic compound [42]                                                             |
| 17 | Nonadecane                                                                         | 0.38  | 14.028 | C <sub>19</sub> H <sub>38</sub>                               | 266 | Antibacterial activity [44]                                                         |
| 18 | Eicosane                                                                           | 0.18  | 12.511 | C <sub>20</sub> H <sub>42</sub>                               | 282 | Antifungal, antibacterial, larvicidal activity [45]                                 |
| 19 | Dodecane,4,6-dimethyl                                                              | 0.23  | 10.212 | C <sub>14</sub> H <sub>30</sub>                               | 198 | Antimicrobial activity [46]                                                         |
| 20 | Dodecane, 2,6,11-trimethyl                                                         |       |        | C <sub>15</sub> H <sub>32</sub>                               | 212 | Antimicrobial activity [46]                                                         |
| 21 | Tetradecane                                                                        | 0.33  | 11.371 | C <sub>14</sub> H <sub>28</sub>                               | 196 | Nematicidal activity [47]                                                           |
| 22 | 2-Methylhexacosane                                                                 | -     | -      | C <sub>27</sub> H <sub>56</sub>                               | 380 | antimicrobial activity [47]                                                         |
| 23 | 2-Propenoic acid, pentadecyl ester                                                 | 0.98  | 15.173 | C <sub>18</sub> H <sub>34</sub> O <sub>2</sub>                | 282 | Not found [48]                                                                      |
| 24 | 1-Hexadecanol                                                                      | 0.62  | 13.938 | C <sub>16</sub> H <sub>34</sub> O                             | 242 | Antifungal and                                                                      |

|    |                                                                  |      |        |                                                               |     |                                                                         |
|----|------------------------------------------------------------------|------|--------|---------------------------------------------------------------|-----|-------------------------------------------------------------------------|
|    |                                                                  |      |        |                                                               |     | antifeedant ability [48]                                                |
| 25 | 1,3-Benzenedicarboxylic acid, bis(2-ethylhexyl) ester            | 0.54 | 25.280 | C <sub>24</sub> H <sub>38</sub> O <sub>4</sub>                | 390 | Antimicrobial activity [48]                                             |
| 26 | 2-Propenoic acid, pentadecyl ester                               | 0.98 | 15.173 | C <sub>18</sub> H <sub>34</sub> O <sub>2</sub>                | 282 | Not found [48]                                                          |
| 27 | Octadecane                                                       | 0.27 | 16.396 | C <sub>18</sub> H <sub>38</sub>                               | 254 | Antifungal activity [48,49]                                             |
| 28 | Isopropyl myristate                                              | 0.27 | 16.656 | C <sub>17</sub> H <sub>34</sub> O <sub>2</sub>                | 270 | Antifungal and antioxidant activity [50]                                |
| 29 | Trifluoro acetoxy hexadecane                                     | 1.00 | 17.328 | C <sub>18</sub> H <sub>33</sub> F <sub>3</sub> O <sub>2</sub> | 338 | Antifungal activity [51]                                                |
| 30 | Tetracosane                                                      | 1.07 | 17.600 | C <sub>24</sub> H <sub>50</sub>                               | 338 | Antimicrobial activity [51]                                             |
| 31 | 7,9-Di-tert-butyl-1-oxaspiro (4,5) deca-a-6,9-diene-2,8-dione    | 2.01 | 17.634 | C <sub>17</sub> H <sub>24</sub> O <sub>3</sub>                | 276 | Antimicrobial and antioxidant activity [53]                             |
| 32 | Hexadecenoic acid, methyl ester                                  | 0.71 | 17.765 | C <sub>17</sub> H <sub>34</sub> O <sub>2</sub>                | 270 | Antifungal activity [54]                                                |
| 33 | Pyrrole[1,2-a] pyrazine-1,4-dione, hexahydro-3-(2-methyl propyl) | 1.30 | 17.829 | C <sub>11</sub> H <sub>18</sub> N <sub>2</sub> O <sub>2</sub> | 210 | Antimicrobial activity [55]                                             |
| 34 | Hexacosyl nonyl ether                                            | 0.71 | 17.920 | C <sub>35</sub> H <sub>72</sub> O                             | 508 | Antimicrobial activity [56]                                             |
| 35 | Dibutyl phthalate                                                | 1.49 | 18.134 | C <sub>16</sub> H <sub>22</sub> O <sub>4</sub>                | 278 | Antioxidant and antimicrobial activities [56]                           |
| 36 | l-(+)-Ascorbic acid 2,6-dihexadecanoate                          | 1.03 | 18.255 | C <sub>38</sub> H <sub>68</sub> O <sub>8</sub>                | 652 | Antiallergic, Antibacterial, Termiticide and Antiviral activity [57,58] |
| 37 | Phthalic acid, 5-methylhex-yl butyl ester                        | 0.44 | 18.311 | C <sub>19</sub> H <sub>28</sub> O <sub>4</sub>                | 320 | Contaminant-[59]                                                        |
| 38 | Isopropyl palmitate                                              | 0.60 | 18.765 | C <sub>19</sub> H <sub>38</sub> O <sub>2</sub>                | 298 | It has antiproliferative activity [60]                                  |
| 39 | 1,2-Benzenedicarboxylic acid, butyl octyl ester                  | 0.28 | 19.114 | C <sub>20</sub> H <sub>30</sub> O <sub>4</sub>                | 334 | Antioxidant activity [61]                                               |
| 40 | n-Tetracosanol-1                                                 | 0.81 | 19.426 | C <sub>24</sub> H <sub>50</sub> O                             | 354 | Antioxidant activity [62]                                               |
| 41 | 2-Methyltetracosane                                              | 0.14 | 19.500 | C <sub>25</sub> H <sub>52</sub>                               | 352 | Free-radical scavenging activity [63]                                   |
| 42 | Nonadecane nitrile                                               | 0.16 | 19.637 | C <sub>19</sub> H <sub>37</sub> N                             | 279 | Antifungal activity [64]                                                |
| 43 | Methyl stearate                                                  | 0.76 | 19.804 | C <sub>19</sub> H <sub>38</sub> O <sub>2</sub>                | 298 | Antifungal, free-radical                                                |

|    |                                                              |       |        |                                                  |     |                                                                              |
|----|--------------------------------------------------------------|-------|--------|--------------------------------------------------|-----|------------------------------------------------------------------------------|
|    |                                                              |       |        |                                                  |     | scavenging activity [65]                                                     |
| 44 | Dodecane, 1,1-dimethoxy-Lauraldehyde                         | 0.63  | 20.244 | C <sub>14</sub> H <sub>30</sub> O <sub>2</sub>   | 230 | Antifungal, antimicrobial antibacterial activities [66]                      |
| 45 | Octadecanoic acid 3-oxo-, ethyl ester                        | 0.19  | 22.945 | C <sub>20</sub> H <sub>38</sub> O <sub>3</sub>   | 326 | Antifungal activity [67]                                                     |
| 46 | 2-Ethylbutyric acid, eicosyl ester                           | 2.16  | 23.131 | C <sub>26</sub> H <sub>52</sub> O <sub>2</sub>   | 396 | Antioxidant, anti-inflammatory, Antioxidant activity, anticancer [68]        |
| 47 | Hexadecanoic acid, 2-hydroxy-1- (hydrooxymethyl) ethyl ester | 22.44 | 23.344 | C <sub>19</sub> H <sub>38</sub> O <sub>4</sub>   | 330 | Antioxidant, nematocidal activity [69]                                       |
| 48 | Octadecanoic acid, 2,3-dihydroxypropyl ester                 | 7.31  | 25.087 | C <sub>21</sub> H <sub>42</sub> O <sub>4</sub>   | 358 | Antimicrobial, nematocidal [69]                                              |
| 49 | Bis(2-ethylhexyl) phthalate                                  | 2.11  | 23.457 | C <sub>24</sub> H <sub>38</sub> O <sub>4</sub>   | 390 | Plasticizers [70]                                                            |
| 50 | Octocrylene 2-Propenoic acid,                                | 0.16  | 24.490 | C <sub>24</sub> H <sub>27</sub> NO <sub>2</sub>  | 361 | Antioxidant activities [70,71]                                               |
| 51 | Squalene e 2,6,10,14,18,22-Tetracosahexaene,                 | 2.19  | 25.953 | C <sub>30</sub> H <sub>50</sub>                  | 410 | It is a precursor of various hormones and having antioxidant activities [72] |
| 52 | Tris (2,4-di-tert-butyl phenyl) phosphate                    | 0.98  | 33.436 | C <sub>42</sub> H <sub>63</sub> O <sub>4</sub> P | 662 | Antioxidant activity [73]                                                    |
| 53 | 2-methyl tetracosane                                         | 0.14  | 19.515 | C <sub>25</sub> H <sub>52</sub>                  | 352 | Antifungal activity [74,75]                                                  |
| 54 | 2,6,10-Trimethyltridecane                                    |       |        | C <sub>16</sub> H <sub>34</sub>                  | 226 | Antimicrobial activity [76]                                                  |
| 55 | 2-Isopropyl-5-methyl-1-heptanol                              |       |        | C <sub>11</sub> H <sub>24</sub> O                | 172 | Antimicrobial activity [78]                                                  |
| 56 | Behenic alcohol                                              | -     | -      | C <sub>22</sub> H <sub>46</sub> O                | 326 | Fungicidal, larvicidal activity [79]                                         |
| 57 | N-2-ethylhexyl acetone imine                                 | -     | -      | C <sub>11</sub> H <sub>23</sub> N                | 169 | Antimicrobial activity [80]                                                  |
| 58 | N(1)-(3-Methyl-1,2,4-oxadiazol-5-yl)-1-                      | -     | -      | C <sub>8</sub> H <sub>13</sub> N <sub>5</sub> O  | 195 | Antifungal activity [81]                                                     |



|    |                                                           |      |        |                                                   |     |                                                                                                               |
|----|-----------------------------------------------------------|------|--------|---------------------------------------------------|-----|---------------------------------------------------------------------------------------------------------------|
|    | pyrrolidinecarboxamide                                    |      |        |                                                   |     |                                                                                                               |
| 59 | Propionitrile 3-(3,5-di-tert-butyl-4-hydroxyphenyl)thio-  | -    | -      | C <sub>17</sub> H <sub>25</sub> NOS               | 291 | Antimicrobial activity [81]                                                                                   |
| 60 | Octahydro-2H-pyrido(1,2-a)pyrimidin-2-one                 | -    | -      | C <sub>8</sub> H <sub>14</sub> N <sub>2</sub> O   | 154 | Antimicrobial activity [82]                                                                                   |
| 61 | 2,4-Di-tert-butyl-phenol) phosphate                       | 2.37 | 12.909 | C <sub>14</sub> H <sub>22</sub> O                 | 206 | It has fungicidal activity against (Aspergillus niger, Fusarium oxysporum and Penicillium chrysogenum [86,87] |
| 62 | Heptacos-1-ene                                            |      | -      | C <sub>27</sub> H <sub>54</sub>                   | 378 | Antimicrobial activity [88]                                                                                   |
| 63 | 12,12-Dimethoxydodecanoic acid                            |      | -      | C <sub>15</sub> H <sub>30</sub> O <sub>4</sub>    | 274 | Antimicrobial activity [89]                                                                                   |
| 64 | Nonyl tetradecyl ether                                    | 0.18 | 15.571 | C <sub>23</sub> H <sub>48</sub> O                 | 340 | Antimicrobial activity [90]                                                                                   |
| 65 | 1,2-Benzenedicarboxylic acid, bis (2-methyl propyl) ester | 3.67 | 17.108 | C <sub>16</sub> H <sub>22</sub> O <sub>4</sub>    | 278 | Antimicrobial activity [90]                                                                                   |
| 66 | Pentadecanoic acid, methyl ester                          | 0.36 | 16.350 | C <sub>18</sub> H <sub>34</sub> O <sub>2</sub>    | 282 | Antimicrobial activity [90]                                                                                   |
| 67 | Dodecane, 2,6,11-trimethyl                                |      |        | C <sub>15</sub> H <sub>32</sub>                   | 212 | Antimicrobial activity [91]                                                                                   |
| 68 | Docosanoic acid, ethyl ester                              | 0.52 | 18.475 | C <sub>24</sub> H <sub>48</sub> O <sub>2</sub>    | 368 | Antimicrobial activity [91]                                                                                   |
| 69 | Silane                                                    | -    | -      | C <sub>29</sub> H <sub>62</sub> O <sub>2</sub> Si | 470 | Antimicrobial activity [93]                                                                                   |

**Table S2.** Secondary metabolites production in *Serendipita indica* in the presence of arsenic stress

| S. No | Metabolites  | Area(%) | Retention time | Molecular formula                               | Molecular weight | Function                                                                                                 |
|-------|--------------|---------|----------------|-------------------------------------------------|------------------|----------------------------------------------------------------------------------------------------------|
| 1     | Olean-18-ene | -       | -              | C <sub>30</sub> H <sub>50</sub>                 | 410              | Antiviral activity [22]                                                                                  |
| 2     | L-Leucine    | -       | -              | C <sub>21</sub> H <sub>39</sub> NO <sub>3</sub> | 353              | L-Leucine can be assimilated by bacteria when sugars or other preferential carbon sources in the habitat |

|    |                                                                                    |       |        |                                                               |     |                                                                            |
|----|------------------------------------------------------------------------------------|-------|--------|---------------------------------------------------------------|-----|----------------------------------------------------------------------------|
|    |                                                                                    |       |        |                                                               |     | are depleted [23]                                                          |
| 3  | L-Proline                                                                          |       | -      | C <sub>27</sub> H <sub>51</sub> NO <sub>3</sub>               | 437 | Antioxidant activity [24]                                                  |
| 4  | Cyclo(L-prolyl-L-valine)                                                           | 2.01  | 16.788 | C <sub>10</sub> H <sub>16</sub> N <sub>2</sub> O <sub>2</sub> | 196 | It is a metabolite involved in the signaling process by releasing AHL [28] |
| 5  | Ergotaman-3',6',18-trione,                                                         | -     | -      | C <sub>33</sub> H <sub>37</sub> N <sub>5</sub> O <sub>5</sub> | 583 | Antimicrobial activity [30]                                                |
| 6  | Phenol, 2,4-bis (1,1-dimethyl ethyl)-, phosphite                                   | 0.83  | 32.914 | C <sub>42</sub> H <sub>63</sub> O <sub>3</sub> P              | 646 | Antioxidant activity [33]                                                  |
| 7  | 5,9,13,17-Tetramethyl 4,8,12,16-octadecatetraenoic acid                            | -     | -      | C <sub>22</sub> H <sub>36</sub> O <sub>2</sub>                | 332 | Antidiabetic and antiaging property [35]                                   |
| 8  | Tetramethyl octadecatetraenoic acid                                                | -     | -      | C <sub>22</sub> H <sub>36</sub> O <sub>2</sub>                | 331 | Antidiabetic and antiaging property [35]                                   |
| 9  | Glycerol tri caprylate                                                             | 0.26  | 27.393 | C <sub>27</sub> H <sub>50</sub> O <sub>6</sub>                | 470 | Antifungal activity [36]                                                   |
| 10 | 2-(4-Hydroxy-4-methyl-tetrahydro-pyran-3-ylamino)-3-(1H-indol-2-yl)-propionic acid | -     | -      | C <sub>17</sub> H <sub>22</sub> N <sub>2</sub> O <sub>4</sub> | 318 | Probiotic compound [42]                                                    |
| 11 | 3-Indol-1-yl-propionic acid, methyl ester                                          | -     | -      | C <sub>17</sub> H <sub>22</sub> N <sub>2</sub> O <sub>4</sub> | 318 | Probiotic compound [42]                                                    |
| 12 | Tridecanoic acid, 12-methyl-, methyl ester                                         | 0.38  | 16.370 | C <sub>15</sub> H <sub>30</sub> O <sub>2</sub>                | 242 | Antimicrobial, insecticidal activities [43]                                |
| 13 | 7,9-Di-tert-butyl-1-oxaspiro (4,5) Deca-6,9 9-diene-2,8-dione                      | 2.04  | 17.633 | C <sub>17</sub> H <sub>24</sub> O <sub>3</sub>                | 276 | Antimicrobial and antioxidant activities [53]                              |
| 14 | Hexadecanoic acid, methyl ester                                                    | 1.33  | 17.772 | C <sub>17</sub> H <sub>34</sub> O <sub>2</sub>                | 270 | Antifungal activity [53]                                                   |
| 15 | Hexadecanoic acid, 2-hydroxy-1- (hydrooxymethyl) ethyl ester Palmitin,             | 44.99 | 23.334 | C <sub>19</sub> H <sub>38</sub> O <sub>4</sub>                | 330 | Antimicrobial and antioxidant activities [67]                              |
| 16 | 2-Ethylbutyric acid, eicosyl ester                                                 | 3.50  | 23.139 | C <sub>26</sub> H <sub>52</sub> O <sub>2</sub>                | 396 | Antimicrobial, anti-                                                       |

|    |                                                                  |       |        |                                                               |     |                                                                 |
|----|------------------------------------------------------------------|-------|--------|---------------------------------------------------------------|-----|-----------------------------------------------------------------|
|    |                                                                  |       |        |                                                               |     | inflammatory, activities [68]                                   |
| 17 | Octadecanoic acid, 2,3-dihydroxypropyl ester Stearin             | 14.24 | 25.080 | C <sub>21</sub> H <sub>42</sub> O <sub>4</sub>                | 358 | Antimicrobial, nematocidal activity [69]                        |
| 18 | Octocrylene 2-Propenoic acid,                                    | 0.59  | 24.490 | C <sub>24</sub> H <sub>27</sub> NO <sub>2</sub>               | 361 | Antifungal activity [71]                                        |
| 19 | Tris (2,4-di-tert-butyl phenyl) phosphate                        | 2.07  | 35.431 | C <sub>42</sub> H <sub>63</sub> O <sub>4</sub> P              | 662 | antioxidant activity [73]                                       |
| 20 | n-Hexadecanoic acid                                              | 1.44  | 18.239 | C <sub>16</sub> H <sub>32</sub> O <sub>2</sub>                | 256 | Nematicidal, antioxidant [81]                                   |
| 21 | Octahydro-2H-pyrido(1,2-a)pyrimidin-2-one                        | -     | -      | C <sub>8</sub> H <sub>14</sub> N <sub>2</sub> O               | 154 | Antimicrobial activity [82,83]                                  |
| 22 | 2,4-Di-tert-butyl-phenol                                         | 9.52  | 12.910 | C <sub>14</sub> H <sub>22</sub> O                             | 206 | Antimicrobial activity [84–86]                                  |
| 23 | 1,2-Benzenedicarboxylic acid, bis (2-methyl propyl) ester        | 0.67  | 17.125 | C <sub>16</sub> H <sub>22</sub> O <sub>4</sub>                | 278 | Antimicrobial activity [90,92]                                  |
| 24 | Pyrrole[1,2-a] pyrazine-1,4-dione, hexahydro-3-(2-methyl propyl) | 1.30  | 17.829 | C <sub>11</sub> H <sub>18</sub> N <sub>2</sub> O <sub>2</sub> | 210 | Antimicrobial activity [94]                                     |
| 25 | Methyl stearate                                                  | 1.69  | 19.803 | C <sub>19</sub> H <sub>38</sub> O <sub>2</sub>                | 298 | Antifungal activity [95]                                        |
| 26 | Tetratriacontyl heptafluorobutyrate                              | 0.32  | 20.729 | C <sub>38</sub> H <sub>69</sub> F <sub>7</sub> O <sub>2</sub> | 690 | Antimicrobial activity [96]                                     |
| 27 | Myristic acid, glycidyl ester Tetradecanoic acid                 | 0.59  | 21.404 | C <sub>17</sub> H <sub>32</sub> O <sub>3</sub>                | 284 | Antifungal properties, Antioxidant, nematocidal activities [97] |
| 28 | 2-Propenoic acid, 3-(4-methoxyphenyl)                            | 0.70  | 21.702 | C <sub>18</sub> H <sub>26</sub> O <sub>3</sub>                | 290 | Antimicrobial activity [98]                                     |
| 29 | 1,2,3,4-Tetrahydro-3- (phenyl acetamido) quinoline               | 0.11  | 22.935 | C <sub>17</sub> H <sub>18</sub> N <sub>2</sub> O              | 266 | Antimicrobial activity [99]                                     |
| 30 | 13-Docosenamide, (Z)- Erucylamide                                | 1.79  | 25.696 | C <sub>22</sub> H <sub>43</sub> NO                            | 337 | Antimicrobial, antioxidant, anti-                               |

|    |                                                                   |      |        |                                                                |     |                                                                                         |
|----|-------------------------------------------------------------------|------|--------|----------------------------------------------------------------|-----|-----------------------------------------------------------------------------------------|
|    |                                                                   |      |        |                                                                |     | inflammatory [100,101]                                                                  |
| 31 | Squalene 2,6,10,14,18,22-Tetracosahexaene,                        | 0.80 | 25.946 | C <sub>30</sub> H <sub>50</sub>                                | 410 | Antibacterial, antioxidant [102]                                                        |
| 32 | 2-(Decanoyloxy) propane-1,3-diyl dioctanoate                      | 0.93 | 30.051 | C <sub>29</sub> H <sub>54</sub> O <sub>6</sub>                 | 498 | Antioxidant activity [103]                                                              |
| 33 | Heptadecanoic acid, 16-methyl-, methyl ester                      | -    | -      | C <sub>19</sub> H <sub>38</sub> O <sub>2</sub>                 | 298 | Used in anti-skin cancer drug [104]                                                     |
| 34 | Tetrapentacontane, 1,54-dibromo-                                  | -    | -      | C <sub>54</sub> H <sub>108</sub> Br <sub>2</sub>               | 914 | Antifungal activity [105]                                                               |
| 35 | Triacetyl heptafluorobutyrate                                     | -    | -      | C <sub>34</sub> H <sub>61</sub> F <sub>7</sub> O <sub>2</sub>  | 634 | Antimicrobial activity [106]                                                            |
| 36 | Hexatriacontyl trifluoroacetate                                   | -    | -      | C <sub>38</sub> H <sub>73</sub> F <sub>3</sub> O <sub>2</sub>  | 618 | Antifungal activity [107]                                                               |
| 37 | 2-Ethylhexyl trans-4-methoxycinnamate                             | -    | -      | C <sub>18</sub> H <sub>26</sub> O <sub>3</sub>                 | 290 | Antimicrobial activity [108]                                                            |
| 38 | 9-Octadecenamide                                                  | -    | -      | C <sub>18</sub> H <sub>35</sub> NO                             | 281 | It is a compound that is used in the medical industry for mood and sleep disorder [109] |
| 39 | 1,2,3,4-Tetrahydronaphthalen-1-yl 2,2,3,3,3-pentafluoropropanoate | -    | -      | C <sub>13</sub> H <sub>11</sub> F <sub>5</sub> O <sub>2</sub>  | 294 | Antimicrobial activity [110]                                                            |
| 40 | L-Tryptophan,N-methyl-, methyl ester                              | -    | -      | C <sub>13</sub> H <sub>16</sub> N <sub>2</sub> O <sub>2</sub>  | 232 | Antimicrobial activity [111]                                                            |
| 41 | 2-Ethylbutyric acid, eicosyl ester                                | -    | -      | C <sub>26</sub> H <sub>52</sub> O <sub>2</sub>                 | 396 | Antimicrobial activity [112]                                                            |
| 42 | Fumaric acid, 2,2,2-trichloroethyl tridecyl ester                 |      |        | C <sub>19</sub> H <sub>31</sub> Cl <sub>3</sub> O <sub>4</sub> | 428 | These are esters used for the treatment of                                              |

|    |                                                                                                                                            |   |   |                                                |     |                                  |
|----|--------------------------------------------------------------------------------------------------------------------------------------------|---|---|------------------------------------------------|-----|----------------------------------|
|    |                                                                                                                                            |   |   |                                                |     | psoriasis and sclerosis [113]    |
| 43 | Cyclooctadecane                                                                                                                            | - | - | C <sub>20</sub> H <sub>40</sub>                | 280 | Antifungal activity [114]        |
| 44 | 2,6,10,14,18-Pentamethyl-2,6,10,14,18-eicosapentaene                                                                                       | - | - | C <sub>25</sub> H <sub>42</sub>                | 342 | Antimicrobial activity [115]     |
| 45 | Lycopene                                                                                                                                   | - | - | C <sub>40</sub> H <sub>66</sub>                | 546 | Anticancer agent [73,116]        |
| 46 | 3-(Octanoyloxy)propane-1,2-diyl bis(decanoate)                                                                                             | - | - | C <sub>31</sub> H <sub>58</sub> O <sub>6</sub> | 526 | Anti-inflammatory activity [117] |
| 47 | Pentacyclo[19.3.1.1(3,7).1(9,13).1(15,19)]octacos-1(25),3,5,7(28),9,11,13(27),15,17,19(26),21,23-dodecaene-25,26,27,28-tetrol, 5,11,17,23- | - | - | C <sub>44</sub> H <sub>56</sub> O <sub>4</sub> | 648 | Antimicrobial activity [118]     |

**Table S3.** Secondary metabolites production in *Serendipita indica* and *Z. sp. ISTPL4* under normal conditions

| S. No. | Metabolites                                          | Area % | Retention time | Molecular formula                               | Molecular weight | Function                                                                                                                                      |
|--------|------------------------------------------------------|--------|----------------|-------------------------------------------------|------------------|-----------------------------------------------------------------------------------------------------------------------------------------------|
| 1      | Butylamine, N,N-dipentyl                             | -      | -              | C <sub>14</sub> H <sub>31</sub> N               | 213              | Antimicrobial activity[13]                                                                                                                    |
| 2      | Eicosyl nonyl ether                                  | -      | -              | C <sub>29</sub> H <sub>60</sub> O               | 424              | Antimicrobial activity[13]                                                                                                                    |
| 3      | Fumaric acid, 2-(diethylamino)ethyl tetradecyl ester | -      | -              | C <sub>24</sub> H <sub>45</sub> NO <sub>4</sub> | 411              | These are alkaloids having antibacterial activity[13]                                                                                         |
| 4      | Olean-18-ene                                         | -      | -              | C <sub>30</sub> H <sub>50</sub>                 | 410              | Antimicrobial activity[22]                                                                                                                    |
| 5      | L-Leucine                                            | -      | -              | C <sub>21</sub> H <sub>39</sub> NO <sub>3</sub> | 353              | L-Leucine can be assimilated by bacteria when sugars or other preferential carbon sources in the habitat are depleted[23]                     |
| 6      | L-Proline                                            | -      | -              | C <sub>28</sub> H <sub>53</sub> NO <sub>3</sub> | 451              | In view of the abundance and different functions of L-proline, it is not surprising that bacteria employ various L-proline-specific transport |

|    |                                                                                                          |      |        |                                                               |     |                                                                                                                                                                                                                                                                                  |
|----|----------------------------------------------------------------------------------------------------------|------|--------|---------------------------------------------------------------|-----|----------------------------------------------------------------------------------------------------------------------------------------------------------------------------------------------------------------------------------------------------------------------------------|
|    |                                                                                                          |      |        |                                                               |     | systems and enzymes allowing the utilization of external L-proline. These systems play important roles in the adaptation of single-cell organisms to steadily changing environmental conditions as they occur in soil, water and during interactions with eukaryotic hosts. [24] |
| 7  | l-(+)-Ascorbic acid 2,6-dihexadecanoate                                                                  | -    | -      | C <sub>38</sub> H <sub>68</sub> O <sub>8</sub>                | 652 | Antimicrobial activity[25]                                                                                                                                                                                                                                                       |
| 8  | Heneicosane, 10-methyl-                                                                                  | 0.18 | 14.344 | C <sub>22</sub> H <sub>46</sub>                               | 310 | Antimicrobial activity[[26]                                                                                                                                                                                                                                                      |
| 9  | Cyclo(L-prolyl-L-valine)                                                                                 | 1.39 | -      | C <sub>10</sub> H <sub>16</sub> N <sub>2</sub> O <sub>2</sub> | 196 | Class of diketopiperazines (DKPs) the compound cyclo-(L-prolyl-L-valine) activated N-acyl homoserine lactone (AHL) bioreporters, indicating that Archaea may have the ability to interact with AHL-producing bacteria within mixed communities. [28]                             |
| 10 | Heneicosane                                                                                              | 0.13 | 14.893 | C <sub>21</sub> H <sub>44</sub>                               | 296 | Antimicrobial activity against <i>Streptococcus pneumoniae</i> and <i>Aspergillus fumigatus</i> [34]                                                                                                                                                                             |
| 11 | Silane, trimethyl(3,5-xylyloxy)-                                                                         | -    | -      | C <sub>11</sub> H <sub>18</sub> OSi                           | 194 | Antimicrobial activity[38][97]                                                                                                                                                                                                                                                   |
| 12 | Ergotaman-3',6',18-trione, 9,10-dihydro-12'-hydroxy-2'-methyl-5'-(phenylmethyl)-, (5'.alpha.,10.alpha.)- | -    | -      | C <sub>33</sub> H <sub>37</sub> N <sub>5</sub> O <sub>5</sub> | 583 | Antimicrobial, Anti-inflammatory, activity[44]                                                                                                                                                                                                                                   |
| 13 | Eicosane                                                                                                 | 0.18 | 12.511 | C <sub>20</sub> H <sub>42</sub>                               | 282 | Antifungal, antibacterial,                                                                                                                                                                                                                                                       |



|    |                                                                  |       |        |                                                               |     |                                                     |
|----|------------------------------------------------------------------|-------|--------|---------------------------------------------------------------|-----|-----------------------------------------------------|
|    |                                                                  |       |        |                                                               |     | larvicidal activity [45]                            |
| 14 | 3-Eicosene, (E)-                                                 | -     | -      | C <sub>20</sub> H <sub>40</sub>                               | 280 | Antifungal, antibacterial, larvicidal activity [45] |
| 15 | Propionamide, N-propyl-N-decyl                                   | -     | -      | C <sub>16</sub> H <sub>33</sub> NO                            | 255 | Antimicrobial activity[[45]                         |
| 16 | Octadecane                                                       | -     | -      | C <sub>18</sub> H <sub>38</sub>                               | 254 | Antifungal activity[48]                             |
| 17 | Tetracosane                                                      | 1.07  | 17.600 | C <sub>24</sub> H <sub>50</sub>                               | 338 | Antimicrobial activity[[52]                         |
| 18 | Ergotaman-                                                       | -     | -      | C <sub>33</sub> H <sub>37</sub> N <sub>5</sub> O <sub>5</sub> | 581 | Antimicrobial, Anti-inflammatory, activity[44]      |
| 19 | Tetracosane                                                      | 0.49  | 20.146 | C <sub>24</sub> H <sub>50</sub>                               | 338 | Antimicrobial activity[[52]                         |
| 20 | 7,9-Di-tert-butyl-1-oxaspiro (4,5) deca-a-6,9-diene-2,8-dione    | 2.01  | 17.634 | C <sub>17</sub> H <sub>24</sub> O <sub>3</sub>                | 276 | Antimicrobial and antioxidant activity[53]          |
| 21 | Hexadecenoic acid, methyl ester                                  | 0.71  | 17.765 | C <sub>17</sub> H <sub>34</sub> O <sub>2</sub>                | 270 | Antifungal activity[54]                             |
| 22 | n-Hexadecanoic acid methyl ester                                 | 2.99  | 18.257 | C <sub>17</sub> H <sub>34</sub> O <sub>2</sub>                | 270 | Antimicrobial activity[54]                          |
| 23 | I-Nonadecene                                                     | 0.22  | 16.323 | C <sub>19</sub> H <sub>38</sub>                               | 266 | Antibacterial activity][[62]                        |
| 24 | 2-Methyltetracosane                                              | 0.28  | 11.578 | C <sub>25</sub> H <sub>52</sub>                               | 352 | Free-radical scavenging activity [63]               |
| 25 | octadecanoic acid, 3-oxo-, ethyl ester                           | 0.59  | 22.945 | C <sub>20</sub> H <sub>38</sub> O <sub>3</sub>                | 326 | Antibacterial activity][[67]                        |
| 26 | Hexadecanoic acid, 2-hydroxy-1-(hydroxymethyl)ethyl ester        | 46.06 | 23.354 | C <sub>19</sub> H <sub>38</sub> O <sub>4</sub>                | 330 | Antimicrobial activity [69]                         |
| 27 | 2-Methylhexacosane                                               | 0.18  | 19.421 | C <sub>27</sub> H <sub>56</sub>                               | 380 | Antimicrobial activity[77]                          |
| 28 | Octadecanoic acid, 2,3-dihydroxypropyl ester                     | 14.81 | 25.093 | C <sub>21</sub> H <sub>42</sub> O <sub>4</sub>                | 358 | Antimicrobial activity[[77]                         |
| 29 | Propionamide, N-propyl-N-decyl                                   | 0.54  | 20.558 | C <sub>16</sub> H <sub>33</sub> NO                            | 255 | Antimicrobial activity[80]                          |
| 30 | Pyrrole[1,2-a] pyrazine-1,4-dione, hexahydro-3-(2-methyl propyl) | 1.30  | 17.829 | C <sub>11</sub> H <sub>18</sub> N <sub>2</sub> O <sub>2</sub> | 210 | Antimicrobial activity[81]                          |

|    |                                                           |      |        |                                                               |     |                                                                                                                                                                                         |
|----|-----------------------------------------------------------|------|--------|---------------------------------------------------------------|-----|-----------------------------------------------------------------------------------------------------------------------------------------------------------------------------------------|
| 31 | Diethylpent-4-enylamine                                   | 3.35 | 16.807 | C <sub>9</sub> H <sub>19</sub> N                              | 141 | Antimicrobial activity [84]                                                                                                                                                             |
| 32 | 3,6-Diisopropylpiperazin-2,5-dione                        | 0.13 | 17.158 | C <sub>10</sub> H <sub>18</sub> N <sub>2</sub> O <sub>2</sub> | 198 | Antimicrobial[[84]                                                                                                                                                                      |
| 33 | 2,4-Di-tert-butyl-phenol) phosphate                       | 2.37 | 12.909 | C <sub>14</sub> H <sub>22</sub> O                             | 206 | It has fungicidal activity against ( <i>Aspergillus niger</i> , <i>Fusarium oxysporum</i> and <i>Penicillium chrysogenum</i> [86]                                                       |
| 34 | 1,2-Benzenedicarboxylic acid, bis (2-methyl propyl) ester | 3.67 | 17.108 | C <sub>16</sub> H <sub>22</sub> O <sub>4</sub>                | 278 | Antimicrobial activity[92]                                                                                                                                                              |
| 35 | Methyl stearate                                           | 0.68 | 19.802 | C <sub>19</sub> H <sub>38</sub> O <sub>2</sub>                | 298 | Antifungal, free-radical scavenging activity[[[96]                                                                                                                                      |
| 36 | Hexadecane                                                | -    |        | C <sub>16</sub> H <sub>34</sub>                               | 226 | It is a long-chain volatile organic compound secreted by bacteria that confer induced resistance against both <i>Pectobacterium carotovorum</i> and <i>Pseudomonas syringae</i> . [119] |
| 37 | Tetradecane                                               | 0.33 | 11.371 | C <sub>14</sub> H <sub>28</sub>                               | 196 | Nematicidal activity[120]                                                                                                                                                               |
| 38 | Heptadecane                                               | 0.22 | 12.505 | C <sub>17</sub> H <sub>36</sub>                               | 240 | These are the mVOC that trigger plant growth promotion by activating the signaling cascade in plant[[121][122]                                                                          |
| 39 | 2-Methyltetracosane                                       | -    | -      | C <sub>25</sub> H <sub>52</sub>                               | 352 | Free-radical scavenging activity[121][123]                                                                                                                                              |
| 40 | Tetrapentacontane                                         | 0.11 | 23.465 | C <sub>54</sub> H <sub>110</sub>                              | 758 | Antibacterial and antioxidant activity[124][127]                                                                                                                                        |
| 41 | Hexanoic acid, heptadecyl ester                           | 3.11 | 23.174 | C <sub>23</sub> H <sub>46</sub> O <sub>2</sub>                | 354 | Antifungal activity[125-127]                                                                                                                                                            |
| 42 | Tetradecyl trifluoroacetate                               | -    | -      | C <sub>16</sub> H <sub>29</sub> F <sub>3</sub> O <sub>2</sub> | 310 | Antimicrobial activity[128-130]                                                                                                                                                         |
| 43 | 6,6-Diethylhooctadecane                                   | 0.12 | 17.690 | C <sub>22</sub> H <sub>46</sub>                               | 310 | Antimicrobial activity[130]                                                                                                                                                             |
| 44 | Eicosane, 1-iodo                                          | -    | -      | C <sub>20</sub> H <sub>41</sub> I                             | 408 | Antimicrobial                                                                                                                                                                           |

|    |                                                            |   |   |            |     |                                                          |
|----|------------------------------------------------------------|---|---|------------|-----|----------------------------------------------------------|
|    |                                                            |   |   |            |     | activity[[131]                                           |
| 45 | Docosane                                                   | - | - | C22H46     | 310 | Antimicrobial activity[132]                              |
| 46 | Hexadecane, 2,6,10,14-tetramethyl                          | - | - | C20H42     | 282 | Antimicrobial activity[133]                              |
| 47 | 5,5-Diethylheptadecane                                     | - | - | C21H44     | 296 | Antimicrobial compound[134]                              |
| 48 | 11-Methylpentacosane                                       | - | - | C26H54     | 366 | Antimicrobial compound[134]                              |
| 49 | Cyclopropanecarboxamide, N-(2-butyl)-N-propyl              | - | - | C16H31NO   | 253 | Antimicrobial activity[135]                              |
| 50 | 3,6-Diisopropylpiperazin-2,5-dione                         | - | - | C10H18N2O2 | 198 | Antimicrobial activity [136]                             |
| 51 | 2-Diethylaminomethyl-3-hydroxy-6-hydroxymethyl-pyran-4-one | - | - | C11H17NO4  | 227 | Antimicrobial activity[137][138]                         |
| 52 | 7-Ethyl-4,6-heptadecandione                                | - | - | C19H36O2   | 296 | Antimicrobial activity[139]                              |
| 53 | 6,6 Diethylhooctadecane                                    | - | - | C20H42     | 282 | Antimicrobial activity[[140]                             |
| 54 | 1-Heptacosanol                                             | - | - | C27H56O    | 396 | Antimicrobial activity[141]                              |
| 55 | 1-Heneicosanol                                             | - | - | C21H44O    | 312 | Antibacterial activity[142]                              |
| 56 | Butylated Hydroxytoluene                                   | - | - | C15H24O    | 220 | Antimicrobial[[142]                                      |
| 57 | 2-Methylhexacosane                                         | - | - | C27H56     | 380 | Pharmaceutically important and anticancer activity [143] |
| 58 | Pentatriacontane                                           | - | - | C35H72     | 492 | Antifungal activity[144][145]                            |
| 59 | Hexanamide, N-propyl-N-decyl                               | - | - | C19H39NO   | 297 | Antimicrobial activity, anti-inflammatory action[146]    |
| 60 | Acetamide, N-propyl-N-decyl                                | - | - | C15H31NO   | 241 | It is herbicide which controls weeds and grasses[147]    |
| 61 | Octanamide, N-propyl-N-decyl                               | - | - | C21H43NO   | 325 | Antifungal activity[148]                                 |
| 62 | Benzene, (2,3-dimethyldecyl)-                              | - | - | C18H30     | 246 | Antimicrobial activity[149]                              |
| 63 | Acridin-9-yl-[1,2,4]triazol-4-yl-amine                     | - | - | C15H11N5   | 261 | Anti tuberculosis[[150]                                  |
| 64 | Silane methyl                                              | - | - | C11H18OSi  | 195 | Antimicrobial activity [93]                              |
| 65 | 1,1'-Biphenyl, 4,4'-                                       | - | - | C14H12Br2  | 338 | Antimicrobial                                            |

|    |                                |   |   |            |     |                                  |
|----|--------------------------------|---|---|------------|-----|----------------------------------|
|    | bis(bromomethyl)-              |   |   |            |     | activity[151]                    |
| 66 | 1,3-Dipalmitin, TMS derivative | - | - | C38H76O5Si | 640 | Antioxidant activity[152]        |
| 67 | Glycerol 1-palmitate           | - | - | C19H38O4   | 330 | Antimicrobial activity[153][154] |

**Table S4.** Secondary metabolites production in *Serendipita indica* and *Z. sp. ISTPL4* in the presence of arsenic stress

| S. No. | Metabolites                                                           | Area % | Retention time | Molecular formula | Molecular weight | Function                                                                                                                                                                   |
|--------|-----------------------------------------------------------------------|--------|----------------|-------------------|------------------|----------------------------------------------------------------------------------------------------------------------------------------------------------------------------|
| 1      | L-Proline                                                             | -      | -              | C27H51NO3         | 437              | Antioxidant activity [22]                                                                                                                                                  |
| 2      | 5-Azacytosine, N,N,O-trimethyl                                        | -      | -              | C6H10N4O          | 154              | -Antimicrobial activity [32]                                                                                                                                               |
| 3      | Olean-18-ene                                                          | -      | -              | C30H50            | 410              | Antiviral activity [22]                                                                                                                                                    |
| 4      | 5-Nitroso-2,4,6-triaminopyrimidine                                    |        |                | C4H6N6O           | 154              | Antimicrobial activities [32]                                                                                                                                              |
| 5      | Phenol, 2,4-bis(1,1-dimethylethyl)-, phosphite                        | 4.12   | 32.990         | C42H63O3P         | 646              | Antioxidant and antifungal activity [33]                                                                                                                                   |
| 6      | Heneicosane                                                           | 3.23   | 35.443         | C21H44            | 296              | Antimicrobial activity against <i>Streptococcus pneumoniae</i> and <i>Aspergillus fumigatus</i> [34]                                                                       |
| 7      | Ethyl 3-hydroxytetracosanoate                                         | -      | -              | C26H52O3          | 412              | Antioxidant activity [35]                                                                                                                                                  |
| 8      | Formamide, N-(4-[2-(1,1-dimethylethyl)-5-oxo-1,3-dioxolan-4-yl]butyl) | -      | -              | C12H21NO4         | 243              | Antimicrobial activity [41]                                                                                                                                                |
| 9      | d-Ribose, 2-deoxy-bis(thioheptyl)-dithioacetal                        | -      | -              | C19H40O3S2        | 380              | Antimicrobial activity [41]                                                                                                                                                |
| 10     | Quercetin, 5TMS derivative                                            |        | -              | C30H50O7Si5       | 662              | Quercetin, a plant-derived polyphenolic flavonoid, has been linked with health benefits in both humans and animals. Quercetin, a natural plant-derived dietary polyphenol, |

|    |                                                                 |       |        |                                                               |     |                                                                                                                                      |
|----|-----------------------------------------------------------------|-------|--------|---------------------------------------------------------------|-----|--------------------------------------------------------------------------------------------------------------------------------------|
|    |                                                                 |       |        |                                                               |     | possesses a high safety profile and extensive beneficial properties including potent antioxidant, anti-inflammatory, antiviral. [41] |
| 11 | Tridecanoic acid, 2-ethyl-2-methyl-, ethyl ester                | -     | -      | C <sub>18</sub> H <sub>36</sub> O <sub>2</sub>                | 284 | Antimicrobial, insecticidal activities [43]                                                                                          |
| 12 | Pyrrolo[1,2-a]pyrazine-1,4-dione, hexahydro-3-(2-methylpropyl)  | -     | -      | C <sub>11</sub> H <sub>18</sub> N <sub>2</sub> O <sub>2</sub> | 210 | Antifungal activity [45]                                                                                                             |
| 13 | Eicosane                                                        | 0.23  | 12.573 | C <sub>20</sub> H <sub>42</sub>                               | 282 | Antimicrobial activity [45]                                                                                                          |
| 14 | Palmitic Acid, TMS derivative                                   | -     | -      | C <sub>19</sub> H <sub>40</sub> O <sub>2</sub> Si             | 328 | Antioxidant and antimicrobial activity [52]                                                                                          |
| 15 | 7,9-Di-tert-butyl-1-oxaspiro(4,5)deca-6,9-diene-2,8-dione       | 1.39  | 17.138 | C <sub>17</sub> H <sub>24</sub> O <sub>3</sub>                | 276 | Antioxidants [53]                                                                                                                    |
| 16 | Hexadecanoic acid, methyl ester                                 | 0.80  | 17.780 | C <sub>17</sub> H <sub>34</sub> O <sub>2</sub>                | 270 | Antibacterial compound [54]                                                                                                          |
| 17 | Pyrrolo[1,2-a]pyrazine-1,4-dione, hexahydro-3-(2-methylpropyl)- | 1.66  | 17.965 | C <sub>11</sub> H <sub>18</sub> N <sub>2</sub> O <sub>2</sub> | 210 | Antifungal activity [55]                                                                                                             |
| 18 | Methyl stearate                                                 | 1.60  | 36.535 | C <sub>19</sub> H <sub>38</sub> O <sub>2</sub>                | 298 | Antifungal, antibacterial, and antioxidant activities [63]                                                                           |
| 19 | octadecanoic acid, 3-oxo-, ethyl ester                          | 0.61  | 22.940 | C <sub>20</sub> H <sub>38</sub> O <sub>3</sub>                | 326 | Antifungal activity [67]                                                                                                             |
| 20 | Hexadecanoic acid, 2-hydroxy-1-(hydroxymethyl)ethyl ester       | 60.66 | 23.530 | C <sub>19</sub> H <sub>38</sub> O <sub>4</sub>                | 330 | Antioxidant, nematocidal activity [69]                                                                                               |
| 21 | Octadecanoic acid, 2,3-dihydroxypropyl ester                    | 20.28 | 25.081 | C <sub>21</sub> H <sub>42</sub> O <sub>4</sub>                | 358 | Antimicrobial activity [69]                                                                                                          |
| 22 | d-Ribose, 2-deoxy-bis(thioheptyl)-dithioacetal                  | 3.22  | 23.125 | C <sub>19</sub> H <sub>40</sub> O <sub>3</sub> S <sub>2</sub> | 380 | Antifungal activity [73]                                                                                                             |

|    |                                                         |      |        |                |     |                                                                                                                                                                                                                                                      |
|----|---------------------------------------------------------|------|--------|----------------|-----|------------------------------------------------------------------------------------------------------------------------------------------------------------------------------------------------------------------------------------------------------|
|    |                                                         |      |        |                |     |                                                                                                                                                                                                                                                      |
| 23 | Glycerol 1-palmitate                                    | -    | -      | C19H38O4       | 330 | Antimicrobial activity [78]                                                                                                                                                                                                                          |
| 24 | 1,3-Dipalmitin, TMS derivative                          | -    | -      | C38H76O5<br>Si | 640 | Acylglycerides [81]                                                                                                                                                                                                                                  |
| 25 | 2,4-Di-tert-butylphenol                                 | 0.25 | 12.952 | C14H22O        | 206 | It has herbicidal and allelochemical activity against ( <i>Asystasia gangetica</i> , <i>Eleusine indica</i> , <i>Leptochloa chinensis</i> , and <i>Oldenlandia verticillata</i> [85]                                                                 |
| 26 | Cyclo(L-prolyl-L-valine)                                | 1.31 | 16.813 | C10H16N2<br>O2 | 196 | Class of diketopiperazines (DKPs) the compound cyclo-(L-prolyl-L-valine) activated N-acyl homoserine lactone (AHL) bioreporters, indicating that Archaea may have the ability to interact with AHL-producing bacteria within mixed communities. [92] |
| 27 | 1,2-Benzenedicarboxylic acid, bis(2-methylpropyl) ester | 0.64 | 17.015 | C16H22O4       | 278 | Antimicrobial activity[92]                                                                                                                                                                                                                           |
| 28 | Silane, dimethyl(docosyloxy)butoxy                      |      | -      | C28H60O2<br>Si | 456 | Anti-inflammatory compound [93]                                                                                                                                                                                                                      |
| 29 | Silane, dimethyl(docosyloxy)butoxy                      |      | -      | C28H60O2<br>Si | 456 | Anti-inflammatory compound [93]                                                                                                                                                                                                                      |
| 30 | Heptadecanoic acid, 16-methyl-, methyl ester            | -    | -      | C19H38O2       | 298 | Used in anti-skin cancer                                                                                                                                                                                                                             |



|    |                                                                                                                                              |   |   |                                                  |     |                                       |
|----|----------------------------------------------------------------------------------------------------------------------------------------------|---|---|--------------------------------------------------|-----|---------------------------------------|
|    |                                                                                                                                              |   |   |                                                  |     | drug [104]                            |
| 31 | Heptadecane, 8-methyl                                                                                                                        | - |   | C <sub>18</sub> H <sub>38</sub>                  | 254 | Antimicrobial activity [106]          |
| 32 | Phenol, 2,5-bis(1,1-dimethylethyl)                                                                                                           | - | - | C <sub>42</sub> H <sub>63</sub> O <sub>4</sub> P | 662 | Antioxidant [139]                     |
| 33 | 2,6,10-Trimethyltridecane                                                                                                                    | - |   | C <sub>16</sub> H <sub>34</sub>                  | 226 | Antimicrobial activity [140]          |
| 34 | Butylated Hydroxytoluene                                                                                                                     | - |   | C <sub>15</sub> H <sub>24</sub> O                | 220 | Antimicrobial [140]                   |
| 35 | 1,3,5-Trisilacyclohexane                                                                                                                     | - | - | C <sub>3</sub> H <sub>12</sub> Si <sub>3</sub>   | 132 | Antimicrobial activity [143]          |
| 36 | 1H-Indene, 1-hexadecyl-2,3-dihydro-                                                                                                          | - |   | C <sub>25</sub> H <sub>42</sub>                  | 342 | Anticholinestr <sup>a</sup> ase [145] |
| 37 | Pentacyclo[19.3.1.1(3,7).1(9,13).1(15,19)]octacos-1(25),3,5,7(28),9,11,13(27),15,17,19(26),21,23-dodecaene-25,26,27,28-tetrol, 5,11,17,23-te |   | - | C <sub>44</sub> H <sub>56</sub> O <sub>4</sub>   | 648 | Antioxidant compound [154]            |
